## Authors:

Lena Tschiderer (Medical University of Innsbruck)  
Sanne Peters (University Medical Center Utrecht)  
Yvonne van der Schouw (University Medical Center Utrecht)  
Anniek van Westing (University Medical Center Utrecht)  
Tammy Tong (University of Oxford)  
Peter Willeit (Medical University of Innsbruck)  
Lisa Seekircher (Medical University of Innsbruck)  
Conchi Moreno Iribas (Instituto de Salud Pública de Navarra, Departamento de Salud, Gobierno de Navarra)  
José María Huerta (Murcia Regional Health Council)  
Marta Crous-Bou (Catalan Institute of Oncology (ICO) - Bellvitge Biomedical Research Institute (IDIBELL))  
Martin Söderholm (Lund University)  
Matthias Schulze (German Institute of Human Nutrition)  
Cecilia Johansson (Umeå University)  
Sara Själander (Umeå University)  
Alicia Heath (Imperial College London)  
Alessandra Macciotta (University of Turin)  
Christina Dahm (Aarhus University)  
Daniel Ibsen (Aarhus University)  
Valeria Pala (Fondazione IRCCS Istituto Nazionale dei Tumori)  
Lene Møllerkjær (Danish Cancer Society Research Center)  
Stephen Burgess (University of Cambridge)  
Angela Wood (Cardiovascular Epidemiology Unit, Department of Public Health and Primary Care, University of Cambridge, United Kingdom)  
Rudolf Kaaks (German Cancer Research Center (DKFZ))  
Verena Katzke (German Cancer Research Center (DKFZ))  
Pilar Amiano (Ministry of Health of the Basque Government)  
Miguel Rodríguez-Barranco (Escuela Andaluza de Salud Pública. Instituto de Investigación Biosanitaria ibs.GRANADA, Universidad de Granada, Granada, Spain)  
Gunnar Engström (Lund University)  
Elisabete Weiderpass (International Agency for Research on Cancer)  
Anne Tjønneland (Danish Cancer Society)  
Jytte Halkjær (Danish Cancer Society Research Center)  
Salvatore Panico (Università Federico II Napoli)  
John Danesh (University of Cambridge)  
Adam S. Butterworth (University of Cambridge)  
N. Charlotte Onland-Moret (Julius Center for Health Sciences & Primary Care, University Medical Center, Utrecht)

# Age at menopause and the risk of stroke: Observational and Mendelian Randomization analysis in 204,244 postmenopausal women

Lena Tschiderer, PhD,<sup>1,2</sup> Sanne AE Peters, PhD,<sup>1,3,4</sup> Yvonne T van der Schouw, PhD,<sup>1</sup> Anniëk C van Westing, MSc,<sup>1,5</sup> Tammy YN Tong, PhD,<sup>6</sup> Peter Willeit, PhD,<sup>2,7</sup> Lisa Seekircher, DI,<sup>2</sup> Conchi Moreno-Iribas, PhD,<sup>8,9,10</sup> José María Huerta, PhD,<sup>11,9</sup> Marta Crous-Bou, PhD,<sup>12,13</sup> Martin Söderholm, PhD,<sup>14,15</sup> Matthias B Schulze, DrPH,<sup>16,17</sup> Cecilia Johansson, MD,<sup>18</sup> Sara Själänder, MD, PhD,<sup>19</sup> Alicia K Heath, PhD,<sup>20</sup> Alessandra Macciotta, MSc,<sup>21</sup> Christina C Dahm, PhD,<sup>22</sup> Daniel B Ibsen, PhD,<sup>22,23,24,25</sup> Valeria Pala, ScD,<sup>26</sup> Lene Mellekjær, PhD,<sup>27</sup> Stephen Burgess, PhD,<sup>7,28,29</sup> Angela Wood, PhD,<sup>7</sup> Rudolf Kaaks, PhD,<sup>30</sup> Verena Katzke, PhD,<sup>30</sup> Pilar Amiano, PharmD, MSc,<sup>31,32,9</sup> Miguel Rodriguez-Barranco, BSc, PhD,<sup>33,34,9</sup> Gunnar Engström, PhD,<sup>15</sup> Elisabete Weiderpass, PhD,<sup>35</sup> Anne Tjønneland, MD, PhD, DMSc,<sup>27,36</sup> Jytte Halkjær, PhD,<sup>27</sup> Salvatore Panico, MD,<sup>37</sup> John Danesh, PhD,<sup>38,39,40,41,42,43</sup> Adam Butterworth, PhD,<sup>7,28,44,45,42</sup> N Charlotte Onland-Moret, PhD<sup>1</sup>

<sup>1</sup>Julius Center for Health Sciences and Primary Care, University Medical Center Utrecht, Utrecht, the Netherlands; <sup>2</sup>Institute of Health Economics, Medical University of Innsbruck, Innsbruck, Austria; <sup>3</sup>The George Institute for Global Health, School of Public Health, Imperial College London, London, United Kingdom; <sup>4</sup>The George Institute for Global Health, University of New South Wales, Sydney, New South Wales, Australia; <sup>5</sup>Division of Human Nutrition and Health, Wageningen University, Wageningen, the Netherlands; <sup>6</sup>Cancer Epidemiology Unit, Nuffield Department of Population Health, University of Oxford, United Kingdom; <sup>7</sup>Department of Public Health and Primary Care, University of Cambridge, Cambridge, United Kingdom; <sup>8</sup>Instituto de Salud Pública y Laboral de Navarra, 31003 Pamplona, Spain; <sup>9</sup>Centro de Investigación Biomédica en Red de Epidemiología y Salud Pública (CIBERESP), 28029 Madrid, Spain; <sup>10</sup>Navarra Institute for Health Research (IdiSNA), 31008 Pamplona, Spain; <sup>11</sup>Department of Epidemiology, Murcia Regional Health Council-IMIB, Murcia, Spain; <sup>12</sup>Unit of Nutrition and Cancer, Cancer Epidemiology Research Program, Catalan Institute of Oncology (ICO) - Bellvitge Biomedical Research Institute (IDIBELL), L'Hospitalet de Llobregat, Barcelona 08908, Spain; <sup>13</sup>Department of Epidemiology, Harvard T.H. Chan School of Public Health, Boston, MA 02115, USA; <sup>14</sup>Department of Neurology, Skåne University Hospital, Lund and Malmö, Malmö, Sweden; <sup>15</sup>Department of Clinical Sciences, Malmö, Lund University, Malmö, Sweden; <sup>16</sup>Department of Molecular Epidemiology, German Institute of Human Nutrition Potsdam-Rehbruecke, Nuthetal, Germany; <sup>17</sup>Institute of Nutritional Science, University of Potsdam, Nuthetal, Germany; <sup>18</sup>Skellefteå Research Unit, Department of Public Health and Clinical Medicine, Umeå University, Umeå, Västerbotten, Sweden; <sup>19</sup>Department of Public Health and Clinical Medicine, Umeå University, Umeå, Sweden; <sup>20</sup>Department of Epidemiology and Biostatistics, School of Public Health,

Imperial College London, London, United Kingdom; <sup>21</sup>Centre for Biostatistics, Epidemiology, and Public Health (C-BEPH), Department of Clinical and Biological Sciences, University of Turin, Turin, Italy; <sup>22</sup>Department of Public Health, Aarhus University, Aarhus, Denmark; <sup>23</sup>Steno Diabetes Center Aarhus, Aarhus, Denmark; <sup>24</sup>MRC Epidemiology Unit, University of Cambridge School of Clinical Medicine, Cambridge, United Kingdom; <sup>25</sup>Department of Nutrition, Exercise and Sports, University of Copenhagen, Frederiksberg, Denmark; <sup>26</sup>Epidemiology and Prevention Unit, Fondazione IRCCS Istituto Nazionale dei Tumori, Milano, Italy; <sup>27</sup>Danish Cancer Society Research Center, Strandboulevarden 49, 2100, Copenhagen, Denmark; <sup>28</sup>Heart and Lung Research Institute, University of Cambridge, Cambridge, United Kingdom; <sup>29</sup>MRC Biostatistics Unit, School of Clinical Medicine, University of Cambridge, Cambridge, United Kingdom; <sup>30</sup>Division of Cancer Epidemiology, German Cancer Research Center, DKFZ, 69120 Heidelberg, Germany; <sup>31</sup>Ministry of Health of the Basque Government, Sub Directorate for Public Health and Addictions of Gipuzkoa, San Sebastian, Spain; <sup>32</sup>Biodonostia Health Research Institute, Epidemiology of Chronic and Communicable Diseases Group, San Sebastian, Spain; <sup>33</sup>Escuela Andaluza de Salud Pública (EASP), 18011 Granada, Spain; <sup>34</sup>Instituto de Investigación Biosanitaria ibs.GRANADA, 18012 Granada, Spain; <sup>35</sup>International Agency for Research on Cancer, World Health Organization, Lyon, France; <sup>36</sup>Department of Public Health, Section of Environmental Health, Faculty of Health and Medical Sciences, University of Copenhagen, DK-1353 Copenhagen, Denmark; <sup>37</sup>School of Medicine, Federico II University, Naples, Italy; <sup>38</sup>BHF Cardiovascular Epidemiology Unit, Department of Public Health and Primary Care, University of Cambridge, Cambridge, United Kingdom; <sup>39</sup>National Institute for Health and Care Research Cambridge Biomedical Research Centre, Cambridge University Hospitals, Cambridge, United Kingdom; <sup>40</sup>The National Institute for Health and Care Research Blood and Transplant Unit (NIHR BTRU) in Donor Health and Genomics, University of Cambridge, Cambridge, United Kingdom; <sup>41</sup>Human Genetics, Wellcome Sanger Institute, Saffron Walden, United Kingdom; <sup>42</sup>Health Data Research UK Cambridge, Wellcome Genome Campus and University of Cambridge, Cambridge, United Kingdom; <sup>43</sup>British Heart Foundation Centre of Research Excellence, Division of Cardiovascular Medicine, Addenbrooke's Hospital, Cambridge, United Kingdom; <sup>44</sup>NIHR Blood and Transplant Research Unit in Donor Health and Behaviour, University of Cambridge, Cambridge, United Kingdom; <sup>45</sup>BHF Centre of Research Excellence, School of Clinical Medicine, Addenbrooke's Hospital, Cambridge, United Kingdom

**Short title:** Age at menopause and the risk of stroke

**Correspondence to:**

Yvonne T van der Schouw

Julius Center for Health Sciences and Primary Care, University Medical Centre Utrecht, Utrecht, the Netherlands

Tel: +31 (0) 631118668; Email: [y.t.vanderschouw@umcutrecht.nl](mailto:y.t.vanderschouw@umcutrecht.nl)

**Word count:** 4,848; 2 Tables; 3 Figures

## 1 **Abstract**

2 **Background:** Observational studies have shown that women with an early  
3 menopause are at higher risk of stroke compared to women with a later menopause.  
4 However, associations with stroke subtypes are inconsistent and the causality is  
5 unclear. Therefore, we conducted a large-scale analysis to investigate the  
6 observational association between age at menopause and different types of stroke  
7 accompanied by a Mendelian Randomization analysis to evaluate causality.

8 **Methods:** We analyzed data of the UK Biobank and EPIC-CVD study.  
9 Postmenopausal women without a history of stroke at baseline were eligible for  
10 inclusion. The study endpoints were total stroke and stroke subtypes (i.e., ischemic  
11 stroke, hemorrhagic stroke, intracerebral hemorrhage, and subarachnoid  
12 hemorrhage). We investigated the observational association between age at  
13 menopause and risk of stroke using Cox-regression analysis in each study separately  
14 before combining effect sizes using random-effects meta-analysis. Cox-regression  
15 analyses were progressively adjusted for (1) age, (2) smoking status, body mass index,  
16 glycated hemoglobin, total cholesterol, and hypertension, and (3) ever use of hormone  
17 replacement therapy and age at menarche. We used two-sample Mendelian  
18 Randomization analysis to study whether there is a causal relationship between  
19 genetically proxied age at menopause and risk of stroke.

20 **Results:** A total of 204,244 women were included (7,883 from EPIC-CVD [5,292 from  
21 the sub-cohort]; 196,361 from the UK Biobank). Pooled mean baseline age was 58.9  
22 years (SD 5.8) and pooled mean age at menopause was 47.8 years (SD 6.2). Natural  
23 menopause occurred in 77.6% of all women. Over a median follow-up of 12.6 years  
24 (IQR 11.8, 13.3), 6,770 women experienced a stroke. In multivariable adjusted  
25 observational analyses, the pooled hazard ratios per five years younger age at

26 menopause were 1.09 (95% CI: 1.07, 1.12) for stroke, 1.09 (1.06, 1.13) for ischemic  
27 stroke, 1.10 (1.04, 1.16) for hemorrhagic stroke, 1.14 (1.08, 1.20) for intracerebral  
28 hemorrhage, and 1.00 (0.84, 1.20) for subarachnoid hemorrhage. The Mendelian  
29 Randomization analysis found no evidence for a causal relationship between  
30 genetically proxied age at menopause and risk of any type of stroke.

31 **Conclusions:** Earlier age at menopause is associated with, but not causally related to  
32 the risk of stroke.

## 33 **Clinical Perspective**

### 34 **What is new?**

- 35 • This analysis involves over 200,000 postmenopausal women and more than  
36 6,000 incident stroke cases and investigates the observational association  
37 between age at menopause and various subtypes of stroke. Furthermore, a  
38 Mendelian Randomization analysis was conducted to study whether  
39 associations are causal or not.
- 40 • Earlier age at menopause was statistically significantly associated with a higher  
41 risk of stroke and its subtypes ischemic stroke, hemorrhagic stroke, and  
42 intracerebral hemorrhage. We found no statistically significant relationship  
43 between earlier or later age at menopause and risk of subarachnoid  
44 hemorrhage.
- 45 • The Mendelian Randomization analysis suggested no causal effect of  
46 genetically proxied age at menopause and risk of any type of stroke.

### 47 **What are the clinical implications?**

- 48 • Women with earlier age at menopause are at higher risk of stroke. The  
49 underlying reasons need to be further investigated.
- 50 • Our analysis suggested that earlier menopause *per se* does not cause stroke.  
51 For prevention and adequate treatment of stroke in women, a better  
52 understanding of the specific role of menopause and the mechanistic  
53 background that leads to higher risk of stroke is needed.

## 54 **Non-standard Abbreviations and Acronyms**

|    |           |                                                               |
|----|-----------|---------------------------------------------------------------|
| 55 | CI        | Confidence interval                                           |
| 56 | EPIC-CVD  | European Prospective Investigation into Cancer and Nutrition- |
| 57 |           | Cardiovascular Diseases                                       |
| 58 | GWAS      | Genome-wide association study                                 |
| 59 | InterLACE | International Collaboration for a Life Course Approach to     |
| 60 |           | Reproductive Health and Chronic Disease Events                |
| 61 | IQR       | Interquartile range                                           |
| 62 | IVW       | Inverse variance weighted                                     |
| 63 | HbA1c     | Glycated hemoglobin                                           |
| 64 | HR        | Hazard ratio                                                  |
| 65 | HRT       | Hormone replacement therapy                                   |
| 66 | SD        | Standard deviation                                            |
| 67 | SNP       | Single nucleotide polymorphism                                |
| 68 | UKB       | UK Biobank                                                    |

## 69 **Introduction**

70 Stroke is the second leading cause of death worldwide and was responsible for over  
71 six million deaths in 2019.<sup>1</sup> At a global level, the proportion of deaths caused by stroke  
72 is higher for women (12.5% in 2019) than for men (10.9% in 2019).<sup>2</sup> Women and men  
73 are also prone to different types of stroke. In a large-scale study in over nine million  
74 individuals, men had a higher risk of developing ischemic stroke, transient ischemic  
75 attack, and intracerebral hemorrhage, while women were at higher risk of  
76 subarachnoid hemorrhage.<sup>3</sup> Women and men share several risk factors for stroke but  
77 the strengths of associations can differ between sexes.<sup>4</sup> In addition, the relationship of  
78 various female-specific factors with cardiovascular risk has recently received  
79 increasing attention.<sup>5</sup>

80 The transition to menopause is predominantly defined by hormonal changes, and is  
81 accompanied by multi-faceted symptoms, such as sleep disturbances and vasomotor  
82 dysfunction.<sup>6</sup> Recent data suggest a relationship between earlier menopause and the  
83 risk of developing cardiovascular disease.<sup>7,8</sup> A large-scale individual participant data  
84 meta-analysis of the International Collaboration for a Life Course Approach to  
85 Reproductive Health and Chronic Disease Events (InterLACE) consortium found a  
86 higher risk of developing stroke in women with earlier age at natural menopause.<sup>9</sup> The  
87 hazard ratio (HR) for stroke was 1.72 (95% confidence interval [CI]: 1.43, 2.07) for  
88 women who experienced menopause before the age of 40 years compared to women  
89 who experience menopause at age 50 or 51 years.<sup>9</sup> The majority of previous studies  
90 on age at menopause and risk of stroke focused on a combined stroke endpoint or  
91 analyzed broader categories of ischemic and hemorrhagic stroke rather than specific  
92 stroke subtypes.



93 Since associations between age at menopause and risk of stroke have been based on  
94 data from observational studies, which are prone to confounding, the causality of the  
95 associations is unclear. Importantly, although earlier menopause is also associated  
96 with a higher risk of coronary heart disease,<sup>9</sup> we showed in a recent Mendelian  
97 Randomization analysis that this association is unlikely to be causal.<sup>10</sup> Furthermore, a  
98 Mendelian Randomization analysis based on publicly available results reported no  
99 significant causal relationship between genetically proxied age at natural menopause  
100 and risk of coronary artery disease or stroke.<sup>11</sup> Similarly, a recently published study  
101 demonstrated no causal association between age at natural menopause and risk of  
102 ischemic stroke, although a small number of genetic variants was used.<sup>12</sup> Whether this  
103 is also true for other types of stroke is still unclear.

104 We conducted a large-scale analysis including 204,244 postmenopausal women from  
105 the UK Biobank (UKB) and European Prospective Investigation into Cancer and  
106 Nutrition-Cardiovascular Diseases (EPIC-CVD) study to quantify the observational  
107 association between age at menopause and different types of stroke, and to  
108 investigate whether these associations were likely to be causal by applying a  
109 Mendelian Randomization analysis.

## 110 **Methods**

### 111 **Study participants**

112 In the present analysis, we included data from the UKB and EPIC-CVD study. Further  
113 details about these studies have been published previously.<sup>13–16</sup> In brief, the UKB is a  
114 large-scale prospective study in the UK in which over 500,000 individuals aged 40 to  
115 69 years were recruited between 2006 and 2010.<sup>13,14</sup> The UKB was approved by the  
116 North West Multi-Centre Research Ethics Committee and all participants provided  
117 written informed consent. EPIC-CVD is a case-cohort study nested in the prospective

118 cohort study EPIC, which recruited more than 500,000 individuals between 35 and 70  
119 years of age in 1992-2000 from 23 centers throughout Europe.<sup>15-17</sup> For the case-cohort  
120 study EPIC-CVD, a random sub-cohort was selected from the EPIC study for which a  
121 variety of biomarkers were obtained. In addition, EPIC-CVD includes all incident  
122 coronary heart disease and stroke events that occurred outside the sub-cohort. The  
123 EPIC study complies with the Declaration of Helsinki, and all participants gave written  
124 informed consent before participating. The study was approved by the local ethics  
125 committees of the participating centers and the Institutional Review Board of the  
126 International Agency for Research on Cancer (IARC, Lyon).

127 For the current analysis, postmenopausal women free of history of stroke at study  
128 baseline were eligible for inclusion. Furthermore, for EPIC-CVD, we excluded women  
129 with incident coronary heart disease and without incident stroke outside the sub-cohort  
130 due to the case-cohort design of study. **Figure 1** provides a flow chart on the selection  
131 of participants contributing to the current analysis. Of the 35,455 EPIC-CVD  
132 participants, we excluded 16,788 men, 632 women from French centers because  
133 follow-up for stroke was unavailable, 87 from Norway because important covariates  
134 were not measured, and 1,034 from Greece due to administrative constraints.

135 Furthermore, we excluded 4,283 women with incident coronary heart disease outside  
136 the EPIC-CVD sub-cohort, 29 women with a history of stroke at baseline, and 4,719  
137 women who were not postmenopausal, leaving 7,883 EPIC-CVD participants  
138 contributing to the current analysis. Of these 7,883 postmenopausal women, 5,292  
139 belonged to the sub-cohort and 2,591 were stroke cases outside the sub-cohort (with  
140 147 further stroke cases also belonging to the sub-cohort). Of the 502,412 individuals  
141 from UKB, 229,086 were excluded because they were male, 3,732 because they had  
142 a history of stroke at baseline, and 73,233 because they were not postmenopausal at  
143 baseline leaving 196,361 UKB participants contributing to our analysis. Consequently,

144 we included a total of 204,244 postmenopausal women from both studies in the  
145 observational analysis.

## 146 **Definition of menopause, age at menopause, and type of menopause**

147 Women were defined as being postmenopausal if they fulfilled at least one of the  
148 following criteria: (1) experienced natural menopause (defined as stopping of periods  
149 in UKB and as reporting no menses for one year or longer due to natural menopause  
150 in EPIC-CVD), (2) had had a unilateral or bilateral ovariectomy in EPIC-CVD or bilateral  
151 ovariectomy in UKB, or (3) had had a hysterectomy. Moreover, where no information  
152 on menopausal status was provided, we defined women aged >54 years as  
153 postmenopausal, as suggested previously.<sup>10</sup> Type of menopause was defined as  
154 surgical if a history of ovariectomy or hysterectomy had been reported and as natural,  
155 otherwise. Age at menopause was defined as age of a woman's last menstruation or,  
156 in case of a surgical menopause, the age at ovariectomy or hysterectomy.

## 157 **Outcome definition**

158 We analyzed a combined stroke endpoint including fatal and non-fatal ischemic and  
159 hemorrhagic stroke with ICD-10 codes I60, I61, I63, and I64. Furthermore, we analyzed  
160 the individual stroke endpoints ischemic stroke (I63, I64), hemorrhagic stroke (I60,  
161 I61), intracerebral hemorrhage (I61), and subarachnoid hemorrhage (I60). For UKB  
162 participants, September 30, 2021, was used as end of follow-up for stroke. In EPIC-  
163 CVD, end of follow-up for stroke varied between the centers ranging from 2003 to 2010.  
164 Time to event was defined as time to stroke, death, or end of follow-up, whichever  
165 occurred first. For the analysis of stroke sub-types, we censored individual stroke  
166 events against each other and defined time to stroke as time to the first individual  
167 stroke endpoint. For instance, if an individual experienced both ischemic and  
168 hemorrhagic stroke, we only analyzed the first stroke event that occurred during follow-

169 up. In case two types of stroke occurred on the same day, we gave preference to  
170 ischemic stroke over intracerebral hemorrhage over other types of stroke.

171 Details about the assessment and definition of additional variables used in our  
172 analyses are described in the **Supplementary Methods**.

### 173 **Genetic data**

174 We obtained individual-level imputed data on genetic variants from both EPIC-CVD  
175 and UKB. Genotyping in EPIC-CVD was performed using the Human Core Exome  
176 array, Illumina 660 Quad array, and Omni Exome Express array.<sup>18</sup> In the UKB,  
177 participants were genotyped with the Affymetrix UK BiLEVE Axiom array and the  
178 Affymetrix UKB Axiom Array.<sup>14,19</sup> Genotype imputation was performed using the  
179 Haplotype Reference Consortium for EPIC-CVD<sup>18</sup> and the Haplotype Reference  
180 Consortium as well as the UK10K haplotype reference panel for the UKB<sup>20</sup>.

181 For the Mendelian Randomization analysis, to quantify genetically proxied age at  
182 menopause, we used genetic variants reported to be associated with age at  
183 menopause by a large-scale genome-wide association study (GWAS) for our  
184 instrumental variable.<sup>11</sup> A detailed selection process of the single nucleotide  
185 polymorphisms (SNPs) is described in the **Supplementary Methods**. Of the 290 SNPs  
186 identified by the GWAS, we excluded 124 SNPs because they were unavailable  
187 (n=63), palindromic (n=16), or rare with minor allele frequencies <0.1 (n=45), and used  
188 the remaining 166 SNPs to determine genetically proxied age at menopause in our  
189 main Mendelian Randomization analysis (see **eFigure 3** and **eTable 1**).

190 As shown in **Figure 1**, from the 204,244 postmenopausal women included in our  
191 observational analysis, we excluded 2,140 women from EPIC-CVD and 6,468 women  
192 from the UKB because data on the SNPs included in our analysis were unavailable,  
193 leaving 195,636 women included in our Mendelian Randomization analysis.

## 194 **Statistical analysis**

### 195 **Descriptive statistics**

196 Summary statistics of continuous variables are provided as means and standard  
197 deviations (SDs) if normally distributed or as medians and interquartile ranges (IQRs),  
198 otherwise. Categorical variables are summarized as numbers and percentages.  
199 Pooled means across both cohorts were obtained from random-effects meta-analysis.  
200 To enhance comparability, we provide descriptive statistics including EPIC-CVD  
201 participants from the sub-cohort only.

### 202 **Observational analyses**

203 For the observational analysis, we estimated the association between age at  
204 menopause and incidence of stroke using Cox-regression analysis. For UKB, we  
205 implemented a Cox proportional hazards model. For EPIC-CVD, we additionally took  
206 into account the case-cohort design of the study by implementing Prentice-weighted  
207 Cox-regression analysis with robust standard errors.<sup>21</sup> For both studies, we used age  
208 at baseline as the underlying time scale. We investigated the relationship between age  
209 at menopause and risk of stroke implementing age at menopause as a continuous  
210 variable and also by categorizing it as <40, 40 to <45, 45 to <50, 50 to <55, and ≥55  
211 years, using 50 to <55 years at menopause as the reference category. When analyzing  
212 age at menopause as a categorical variable, we also obtained P-values for linear  
213 trends by treating the categorical variable as a continuous variable in our model.  
214 Furthermore, we present 95% CIs for each category using quasi variances to enhance  
215 the comparison between individual categories.<sup>22</sup> When analyzing age at menopause  
216 as a continuous variable, we reported HRs per five years younger age at menopause.  
217 For graphical demonstration purposes and to assess non-linearity, we also analyzed  
218 age at menopause using restricted cubic splines with three knots at 45, 50, and 55

219 years of age at menopause using an age of 50 years at menopause as reference. We  
220 progressively adjusted our analysis for (1) age at baseline (Model 1), (2) smoking  
221 status (never, ex, current), body mass index (kg/m<sup>2</sup>), glycated hemoglobin (HbA1c, %),  
222 total cholesterol (mmol/L), and hypertension (yes, no) at baseline (Model 2), and (3)  
223 ever use of hormone replacement therapy (HRT) at baseline (yes, no) and age at  
224 menarche (years) (Model 3). For EPIC-CVD, we additionally stratified all models by  
225 country. Finally, we combined study-specific results using random-effects meta-  
226 analysis when including age at menopause as continuous variable, and multivariate  
227 random-effects meta-analysis<sup>23</sup> when analyzing it as categorical variable. We also  
228 used multivariate random-effects meta-analysis<sup>23</sup> to combine beta coefficients of the  
229 restricted cubic splines model. We imputed missing values using multiple imputation  
230 by chained equations with 14 datasets and 30 iterations (see **Supplementary**  
231 **Methods** for more details).

232 We estimated HRs for risk of stroke per five years younger age at menopause across  
233 the following subgroups: use of HRT (ever vs never), type of menopause (surgical vs  
234 natural), smoking status (current, ex vs never), and age at baseline. We included age  
235 at menopause, the subgroup variable of interest, and a formal interaction term between  
236 age at menopause and the subgroup variable of interest into our model. In addition,  
237 we adjusted the models for the baseline variables age, smoking status, body mass  
238 index, HbA1c, total cholesterol, hypertension, ever use of HRT, and age at menarche,  
239 if appropriate. For illustrative purposes we categorized age at baseline into <60 vs ≥60  
240 years. The P-value for interaction for age at baseline was obtained from a model in  
241 which age at baseline was included as a continuous variable. For EPIC-CVD, we  
242 additionally stratified the model by country. We obtained effect estimates in each study  
243 and combined them using multivariate random-effects meta-analysis.<sup>23</sup>

## 244 **Mendelian Randomization analysis**

245 For the effect of the genetic variants on age at menopause, we used the beta  
246 coefficients and standard errors reported by the GWAS published by Ruth et al.<sup>11</sup>  
247 without the UKB data in order to avoid sample overlap. We transformed beta  
248 coefficients and standard errors to reflect genetic effects per five years age at  
249 menopause to enhance comparability to our observational analysis. Then, we  
250 investigated the strength of our genetic instrument based on the F-statistic. For both  
251 EPIC-CVD and UKB, the F-statistic was calculated from linear regression including all  
252 genetic variants as independent variables and age at menopause as the dependent  
253 variable using the first imputed dataset and only including individuals from the sub-  
254 cohort for EPIC-CVD. Next, we estimated the effect of genetically proxied age at  
255 menopause and risk of different types of stroke using Cox-regression analysis with age  
256 as the underlying time scale. For UKB, we adjusted our model for age at baseline and  
257 the first 16 genetic principal components as suggested by Privé et al.<sup>24</sup> For EPIC-CVD,  
258 we adjusted our model for age at baseline, the first ten genetic principal components  
259 (as 16 were not available), and genotype array, stratified by country, and implemented  
260 Prentice-weighted Cox-regression.<sup>21</sup> We obtained effect estimates and standard errors  
261 for the association of each SNP with risk of different types of stroke. Finally, we  
262 conducted the Mendelian Randomization analysis based on (1) the effect estimates of  
263 the association between the SNPs and risk of different types of stroke we obtained  
264 from the UKB and EPIC-CVD and (2) the GWAS summary effect estimates on the  
265 relationship between the SNPs and age at menopause using the R-package  
266 *MendelianRandomization*.<sup>25</sup> We applied standard inverse-variance weighted (IVW)  
267 regression to obtain the effect estimates for the association of genetically proxied age  
268 at menopause with risk of different types of stroke. We combined the effect sizes  
269 across studies using fixed-effect meta-analysis.



270 We conducted several sensitivity analyses. First, we applied different Mendelian  
271 Randomization analysis methods including simple median regression, weighted  
272 median regression, and MR-Egger regression. Second, we conducted a leave-one-out  
273 analysis omitting each SNP in turn to identify whether one of the SNPs particularly  
274 drives the result. Third, to study the distribution of stroke-related and female-specific  
275 factors across genetically proxied age at menopause, we obtained a polygenic risk  
276 score by calculating a weighted sum of the SNPs used in our analysis, weighting each  
277 SNP with the corresponding summary effect size obtained from the GWAS. We divided  
278 the polygenic risk score into study-combined fifths (fifths were comparable between  
279 the two studies) and compared the variables smoking status, body mass index, HbA1c,  
280 total cholesterol, hypertension, ever use of HRT, and age at menarche, across the five  
281 categories. Fourth, we further investigated pleiotropy by implementing MR-PRESSO.<sup>26</sup>  
282 Fifth, to consider the effect of rare genetic variants, we excluded SNPs with minor allele  
283 frequencies <0.01 (n=8), rather than those with minor allele frequencies <0.1 as we  
284 did in our primary analysis. This sensitivity analysis included 203 SNPs, which are  
285 listed in **eTable 1**. Sixth, we additionally adjusted our Mendelian Randomization  
286 analysis for phenotypes associated with cardiovascular risk, i.e., smoking status, body  
287 mass index, HbA1c, total cholesterol, hypertension, ever use of HRT, and age at  
288 menarche.

289 Statistical analyses were carried out using R 4.0.5 (The R Foundation, Vienna,  
290 Austria). All statistical tests were two-sided and P-values  $\leq 0.05$  were deemed as  
291 statistically significant.



## 292 Results

### 293 Study population

294 Baseline characteristics of the study participants are demonstrated in **Table 1**,  
295 separately for the EPIC-CVD sub-cohort and UKB, and pooled across both cohorts.  
296 Overall, mean age was 58.9 years (SD 5.8) at baseline and 47.8 years (SD 6.2) at  
297 menopause. Surgical menopause was reported by 22.4% of the participants. Mean  
298 age at surgical and natural menopause was 41.9 (SD 7.0) and 49.8 (SD 4.6),  
299 respectively. Moreover, 51.3% of the women had a history of hypertension, 33.3% of  
300 the women smoked previously, and 8.7% smoked currently. Half of the women  
301 reported to have used HRT during their lifetime.

### 302 Observational analysis

303 Over a median follow-up of 12.6 years (IQR 11.8, 13.3; 13.0 [10.8, 14.3] in EPIC-CVD  
304 and 12.6 [11.8, 13.3] in UKB), 6,770 women experienced a stroke. Of those, 5,155  
305 were ischemic and 1,615 were hemorrhagic (976 intracerebral hemorrhages and 639  
306 subarachnoid hemorrhages). Of the 6,770 strokes, 2,738 occurred in EPIC-CVD and  
307 4,032 in UKB. Pooled results on the association of age at menopause with risk of stroke  
308 are provided in **Table 2** and **Figure 2**. Each five years younger at menopause was  
309 associated with a higher risk of total stroke (most adjusted HR 1.09 [95% CI: 1.07,  
310 1.12]), ischemic stroke (1.09 [1.06, 1.13]), hemorrhagic stroke (1.10 [1.04, 1.16]), and  
311 intracerebral hemorrhage (1.14 [1.08, 1.20]). Age at menopause was not associated  
312 with the risk of subarachnoid hemorrhage (most adjusted HR 1.00 [0.84, 1.20] for each  
313 five years younger). Age at menopause was approximately log-linearly associated with  
314 the risk of stroke (P-value for trend <0.001), ischemic stroke (P-value for trend <0.001),  
315 hemorrhagic stroke (P-value for trend 0.022), and intracerebral hemorrhage (P-value  
316 for trend <0.001). For instance, compared to women who had experienced menopause

317 between 50 and <55 years, multivariable adjusted HRs for stroke were 1.42 (1.28,  
318 1.56), 1.23 (1.14, 1.33), 1.10 (1.02, 1.19), and 0.96 (0.84, 1.10) in women who had  
319 experienced menopause at ages <40, 40 to <45, 45 to <50, and  $\geq$ 55 years,  
320 respectively. Separate results for EPIC-CVD and UKB are shown **eTable 2** and **eTable**  
321 **3**, respectively. Results for all subtypes of stroke, except subarachnoid hemorrhage  
322 (higher risk for younger age at menopause in UKB but not in EPIC-CVD), were highly  
323 consistent between EPIC-CVD and UKB as demonstrated in **eFigure 1**.  
324 **eFigure 2** provides results of subgroup analyses for each individual stroke endpoint  
325 according to age at baseline, smoking status, use of HRT, and type of menopause.  
326 Age at baseline modified the association between age at menopause and total stroke  
327 (P-value for interaction 0.010) and ischemic stroke (P-value for interaction 0.003) with  
328 higher HRs for younger postmenopausal women. We did not find any statistically  
329 significant modification across all other subgroups (all P-values >0.05).

### 330 **Mendelian Randomization analysis**

331 The F-statistics for the 166 SNPs included in our Mendelian Randomization analysis  
332 were 1.31 ( $R^2$ : 5.2%) in EPIC-CVD and 23.2 ( $R^2$ : 2.0%) in UKB.

333 Results of the Mendelian Randomization analysis are provided in **Figure 3** (see **eTable**  
334 **4** for study-specific results). In contrast to the observational analysis, the IVW  
335 regression showed no evidence for a causal effect of age at menopause on stroke risk  
336 (HR per five years younger genetically proxied age at menopause 0.95 [95% CI: 0.82,  
337 1.09; P-value=0.445]), nor for any of the individual stroke endpoints ischemic stroke,  
338 hemorrhagic stroke, intracerebral hemorrhage, or subarachnoid hemorrhage (all P-  
339 values>0.05).

## 340 **Sensitivity analyses**

341 The results of the Mendelian Randomization analyses were similar when applying  
342 simple median, weighted median, and MR-Egger regression (see **Figure 3** and **eTable**  
343 **4**). Furthermore, leave-one-out analyses showed robust associations when excluding  
344 each SNP in turn (data not shown). The MR-Egger method did not show any evidence  
345 for pleiotropy (P-values of intercept >0.05, see **Figure 3** and **eTable 4**). Furthermore,  
346 MR-PRESSO did not yield any SNPs that produced significant horizontal pleiotropy.  
347 After only excluding rare SNPs with minor allele frequencies <0.01 we again found no  
348 statistically significant relationship between genetically proxied age at menopause and  
349 risk of stroke as demonstrated in **eFigure 4**. Data on baseline patient characteristics  
350 across fifths of the polygenic risk score are provided in **eTable 5** (see distribution  
351 across age at menopause categories in **eTable 6**). There appeared to be an  
352 association between genetically proxied age at menopause and hypertension and ever  
353 use of HRT. However, when we adjusted our Mendelian Randomization analysis for  
354 all phenotypes, the association between genetically proxied age at menopause and  
355 risk of different types of stroke remained statistically nonsignificant as shown in  
356 **eFigure 5**.

## 357 **Discussion**

358 In this large-scale analysis, we found an association between earlier age at  
359 menopause and higher risk of stroke, which was not likely to be causal according to  
360 Mendelian Randomization analysis.

### 361 **Strengths and limitations**

362 Our study has several strengths. First, we included a large sample of postmenopausal  
363 women in our observational analyses and more than 6,000 incident stroke events  
364 providing excellent statistical power to detect associations and the potential influence

365 of a variety of predefined, clinically relevant characteristics. Second, we investigated  
366 several subtypes of stroke including ischemic and hemorrhagic stroke and  
367 intracerebral and subarachnoid hemorrhage. Third, we meta-analyzed data from two  
368 large-scale studies and found highly consistent results for all stroke endpoints except  
369 subarachnoid hemorrhage, which may be explained by limited statistical power for this  
370 subtype. Fourth, we applied Mendelian Randomization analysis, a statistical method  
371 to study whether the results we found in our observational analyses were likely to be  
372 causal. Our analysis also has limitations. First, the EPIC-CVD and UKB studies had a  
373 different study design (case-cohort versus cohort study). To take this into account, we  
374 implemented Cox-regression with Prentice-weighting for EPIC-CVD. Second, the  
375 EPIC-CVD and UKB studies mainly include individuals of European ancestries (>95%  
376 for UKB), which limits the generalizability to other population groups. Of note, also the  
377 underlying GWAS focused on individuals of European ancestry. Consequently, more  
378 data on other populations are needed. Third, although we broadly harmonized the  
379 definition of menopause in EPIC-CVD and the UKB, it differed slightly between the  
380 studies as we did not have data on unilateral ovariectomy in the UKB. Fourth,  
381 menopausal status was missing for some women in the UKB and we estimated it based  
382 on age at baseline as suggested in previously published analyses on EPIC-CVD  
383 data.<sup>27</sup> However, this only affected a small proportion of study participants  
384 (approximately 1% in UKB). Fifth, as age at menopause was self-reported, our  
385 analyses may also be affected by non-differential misclassification, which could have  
386 led to attenuation of the association towards the null. Sixth, although stroke events  
387 were ascertained comprehensively, there may remain some misclassification of  
388 events. However, it has been demonstrated that positive predictive values for stroke  
389 events defined based on hospital or death certificates are usually high.<sup>28</sup> Furthermore,  
390 although we studied several types of stroke, stroke is a heterogeneous disease with

391 many etiological subtypes and we were not able to study associations with more  
392 specific types of stroke. Seventh, Mendelian Randomization analysis relies on several  
393 assumptions. The first assumption is that the genetic variants are associated with the  
394 exposure variable, i.e., with age at menopause. We have used genetic variants  
395 published by a recent GWAS.<sup>11</sup> After harmonization, we included 166 SNPs in our  
396 instrumental variable that had a sufficiently high F-statistic (i.e., >10 as suggested by  
397 Staiger and Stock<sup>29</sup>) for the UKB. In EPIC-CVD, the F-statistic was rather low indicating  
398 weak instrument bias, which is likely due to the lower sample size and large number of  
399 SNPs included (as the R<sup>2</sup> statistic was even higher in EPIC-CVD than in the UKB).  
400 However, as we applied a two-sample Mendelian Randomization analysis, weak  
401 instrument bias acts towards the null and will therefore be conservative and we also  
402 found no significant effect of genetically proxied age at menopause on any type of  
403 stroke in the UKB. Moreover, the GWAS we used to define genetically proxied age at  
404 menopause focused on natural age at menopause. Therefore, our Mendelian  
405 Randomization study only tests for a causal association of age at natural menopause  
406 with stroke risk, while in our observational study we also included women with surgical  
407 menopause. However, our observational subgroup analyses showed no statistically  
408 significant difference in effect sizes between women with natural or surgical age at  
409 menopause. The second assumption of a Mendelian Randomization analysis relies on  
410 the principle that the genetic variants are not associated with confounding factors. We  
411 studied this assumption by comparing the polygenic risk score created by the SNPs  
412 included in our instrumental variable across several potential confounding factors and  
413 could not exclude an association between the polygenic risk score and hypertension  
414 and ever use of HRT. However, when we adjusted the Mendelian Randomization  
415 analysis for all phenotypes related to cardiovascular risk, the association remained  
416 nonsignificant. The third assumption of a Mendelian Randomization analysis is that the

417 effect of the genetic variants on the outcome only goes through the exposure variable.

418 To investigate this assumption, we (1) conducted a Mendelian Randomization analysis  
419 using MR-Egger, which yielded no significant intercepts, suggesting no evidence of  
420 directional pleiotropy, and (2) implemented MR-PRESSO, which resulted in no  
421 pleiotropic SNPs that should be excluded from the analysis.

## 422 **Comparison to previous observational studies**

423 The results from our observational analysis on risk of total stroke are comparable to  
424 previous findings from individual studies including the Korean Heart Study,<sup>30</sup> the China  
425 Kadoorie Biobank,<sup>31</sup> and the Nurses' Health Study<sup>32</sup>. The InterLACE consortium meta-  
426 analyzed data from over 300,000 women, whereby a large proportion of these data  
427 (61%) were from the UKB, leading to an overlap with our study sample.<sup>9</sup> In analyses  
428 excluding data from the UKB, they also found an increased risk of developing stroke  
429 for women with younger age at menopause.<sup>9</sup> Similarly, earlier age at menopause was  
430 associated with higher risk of ischemic stroke in the Korean Heart Study<sup>30</sup> and  
431 Framingham Study.<sup>33</sup> A study in textile workers from China did not confirm this  
432 association.<sup>34</sup> However, in the InterLACE consortium, early menopause was related to  
433 higher risk of ischemic stroke, although these data included UKB as well.<sup>9</sup> In our  
434 analysis, earlier menopause was also associated with a higher risk of hemorrhagic  
435 stroke. In contrast, two previous studies<sup>30,34</sup> reported no significant association  
436 between age at menopause and risk of hemorrhagic stroke. This discrepancy is most  
437 likely due to limited statistical power, as within the InterLACE consortium, again  
438 including UKB, risk of hemorrhagic stroke was higher in women with earlier  
439 menopause.<sup>9</sup> Finally, in our meta-analysis we found no significant relationship between  
440 age at menopause and risk of subarachnoid hemorrhage, unlike an investigation in the  
441 Nurses' Health Study that reported a higher risk of aneurysmal subarachnoid  
442 hemorrhage for women with early menopause.<sup>35</sup> Of note, our observational analysis in

443 the UKB also found women with earlier age at menopause to be at higher risk of  
444 subarachnoid hemorrhage. However, after meta-analyzing data from the UKB with  
445 EPIC-CVD, the pooled hazard ratios were no longer statistically significant. This could  
446 probably be due to limited statistical power in EPIC-CVD as already mentioned above.

### 447 **Mendelian Randomization analysis**

448 Our Mendelian Randomization analysis did not provide evidence that the associations  
449 found in observational analyses are likely to be causal. This finding is in line with a  
450 previous study on the relationship between reproductive aging and risk of coronary  
451 heart disease, which also found that genetically proxied reproductive aging had no  
452 causal effect on risk of coronary heart disease.<sup>10</sup> Furthermore, a Mendelian  
453 Randomization analysis relying on publicly available GWAS results reported no  
454 significant causal relationship between genetically proxied age at natural menopause  
455 and risk of coronary artery disease or stroke.<sup>11</sup> Similarly, a recently published  
456 Mendelian Randomization study, using fewer genetic variants, also reported that there  
457 is likely to be no causal link between age at natural menopause and risk of ischemic  
458 stroke.<sup>12</sup> It is, therefore, likely that residual confounding is present in the observational  
459 analysis even though most observational studies controlled for potential confounding  
460 factors by adjusting for a set of stroke-related risk factors and female-specific factors.  
461 Identifying such confounding factors could help to better understand the development  
462 and progression of cardiovascular disease in women and might provide clues for  
463 previously unknown factors associated with menopause as well as stroke.

### 464 **Implications of the findings**

465 Although our study did not find evidence of a potential causal relationship between age  
466 at menopause and risk of stroke, age at menopause may still be an important marker  
467 for cardiovascular disease in women as demonstrated in our observational analysis.



468 Apparently, earlier age at menopause does not *per se* cause stroke but it captures an  
469 impact on the risk of developing stroke that may be determined by one or more  
470 confounding factors. This seems to hold for various types of stroke including both  
471 ischemic and hemorrhagic stroke. While there was a consistent association between  
472 earlier age at menopause and higher risk of intracerebral hemorrhage in both studies  
473 included in our meta-analysis, the relationship with higher risk of subarachnoid  
474 hemorrhage was only statistically significant in the UKB. As we were not able to  
475 account for the unknown factors driving the observational results in our analysis, further  
476 investigations are warranted. Several factors have been hypothesized to be  
477 responsible for the increased cardiovascular risk after menopause. One frequently  
478 discussed factor that has been speculated to have a cardioprotective effect in  
479 premenopausal women is estrogen.<sup>36</sup> However, it has been shown that the association  
480 between estradiol and risk of myocardial infarction attenuated upon adjustment of age  
481 and other cardiovascular risk factors.<sup>37</sup> Furthermore, when studying causal relations of  
482 age at menopause with different types of outcomes, associations appear to be  
483 specifically confounded when assessing cardiovascular risk as, for instance,  
484 genetically proxied age at menopause was causally related to risk of osteoporosis,  
485 fractures, and lung cancer.<sup>12</sup> Understanding the mechanisms that lead to the  
486 observational relationship between earlier menopause and higher risk of stroke may  
487 help close an important knowledge gap that could enable us to better understand sex-  
488 differences in the development of stroke.

## 489 **Conclusion**

490 Earlier age at menopause is associated with, but not causally related to, the risk of  
491 stroke.



## 492 **Acknowledgements**

493 This research has been conducted using the UKB Resource (Application Number  
494 29916). We are extremely grateful to all participants in UKB. This work was supported  
495 by core funding from the British Heart Foundation (RG/13/13/30194; RG/18/13/33946)  
496 and NIHR Cambridge Biomedical Research Centre (BRC-1215-20014) [\*]. EPIC-CVD  
497 was funded by the European Research Council (268834), the European Commission  
498 Framework Programme 7 (HEALTH-F2-2012-279233) and Novartis. We thank all  
499 EPIC participants and staff for their contribution to the study, the laboratory teams at  
500 the Medical Research Council Epidemiology Unit for sample management and  
501 Cambridge Genomic Services for genotyping, Sarah Spackman for data management,  
502 and the team at the EPIC-CVD Coordinating Centre for study coordination and  
503 administration. \*The views expressed are those of the author(s) and not necessarily  
504 those of the NIHR or the Department of Health and Social Care. The GWAS array was  
505 funded by the European Commission Framework Programme 7 (HEALTH-F2-2012-  
506 279233). Exomechip genotyping projects were funded by Pfizer and Merck. Where  
507 authors are identified as personnel of the International Agency for Research on Cancer  
508 / World Health Organization, the authors alone are responsible for the views expressed  
509 in this article and they do not necessarily represent the decisions, policy or views of  
510 the International Agency for Research on Cancer / World Health Organization.  
511 Furthermore, we thank Bas B L Penning de Vries for valuable advice on the multiple  
512 imputation analysis.

## 513 **Sources of Funding**

514 This work was funded by the Austrian Science Fund (T 1253).

515 **Disclosures**

516 None.

517 **Supplemental Material**

518 Supplemental Methods

519 eTables 1-6

520 eFigures 1-5

## 521 **References**

- 522 1. Vos T, Lim SS, Abbafati C, Abbas KM, Abbasi M, Abbasifard M, Abbasi-  
523 Kangevari M, Abbastabar H, Abd-Allah F, Abdelalim A, et al. Global burden of  
524 369 diseases and injuries in 204 countries and territories, 1990–2019: a  
525 systematic analysis for the Global Burden of Disease Study 2019. *Lancet*.  
526 2020;396:1204–1222. doi: 10.1016/S0140-6736(20)30925-9.
- 527 2. Institute for Health Metrics and Evaluation. GBD Compare Data Visualization.  
528 Seattle, WA: IHME, University of Washington web site.  
529 <https://vizhub.healthdata.org/gbd-compare/>. Accessed July 21, 2022.
- 530 3. Vyas MV, Silver FL, Austin PC, Yu AYG, Pequeno P, Fang J, Laupacis A, Kapral  
531 MK. Stroke Incidence by Sex Across the Lifespan. *Stroke*. 2021;52:447–451. doi:  
532 10.1161/strokeaha.120.032898.
- 533 4. Rexrode KM, Madsen TE, Yu AYG, Carcel C, Lichtman JH, Miller EC. The  
534 Impact of Sex and Gender on Stroke. *Circ Res*. 2022;130:512–528. doi:  
535 10.1161/CIRCRESAHA.121.319915.
- 536 5. O'Kelly AC, Michos ED, Shufelt CL, Vermunt JV, Minissian MB, Quesada O,  
537 Smith GN, Rich-Edwards JW, Garovic VD, El Khoudary SR, et al. Pregnancy and  
538 Reproductive Risk Factors for Cardiovascular Disease in Women. *Circ Res*.  
539 2022;130:652–672. doi: 10.1161/CIRCRESAHA.121.319895.
- 540 6. Nelson HD. Menopause. *Lancet*. 2008;371:760–770. doi: 10.1016/S0140-  
541 6736(08)60346-3.
- 542 7. El Khoudary SR, Aggarwal B, Beckie TM, Hodis HN, Johnson AE, Langer RD,  
543 Limacher MC, Manson JE, Stefanick ML, Allison MA. Menopause Transition and  
544 Cardiovascular Disease Risk: Implications for Timing of Early Prevention: A  
545 Scientific Statement From the American Heart Association. *Circulation*.  
546 2020;142:e506-e532. doi: 10.1161/CIR.0000000000000912.

- 547 8. Peters SA, Woodward M. Women's reproductive factors and incident  
548 cardiovascular disease in the UK Biobank. *Heart*. 2018;104:1069–1075. doi:  
549 10.1136/heartjnl-2017-312289.
- 550 9. Zhu D, Chung H-F, Dobson AJ, Pandeya N, Giles GG, Bruinsma F, Brunner EJ,  
551 Kuh D, Hardy R, Avis NE, et al. Age at natural menopause and risk of incident  
552 cardiovascular disease: a pooled analysis of individual patient data. *The Lancet*  
553 *Public Health*. 2019;4:e553-e564. doi: 10.1016/S2468-2667(19)30155-0.
- 554 10. Dam V, Onland-Moret NC, Burgess S, Chirlaque M-D, Peters SAE, Schuit E,  
555 Tikk K, Weiderpass E, Oliver-Williams C, Wood AM, et al. Genetically  
556 Determined Reproductive Aging and Coronary Heart Disease: A Bidirectional 2-  
557 sample Mendelian Randomization. *J Clin Endocrinol Metab*. 2022;107:e2952-  
558 e2961. doi: 10.1210/clinem/dgac171.
- 559 11. Ruth KS, Day FR, Hussain J, Martínez-Marchal A, Aiken CE, Azad A, Thompson  
560 DJ, Knoblochova L, Abe H, Tarry-Adkins JL, et al. Genetic insights into biological  
561 mechanisms governing human ovarian ageing. *Nature*. 2021;596:393–397. doi:  
562 10.1038/s41586-021-03779-7.
- 563 12. Lankester J, Li J, Salfati ELI, Stefanick ML, Chan KHK, Liu S, Crandall CJ,  
564 Clarke SL, Assimes TL. Genetic evidence for causal relationships between age  
565 at natural menopause and the risk of ageing-associated adverse health  
566 outcomes. *Int J Epidemiol*. 2022. doi: 10.1093/ije/dyac215.
- 567 13. Allen N, Sudlow C, Downey P, Peakman T, Danesh J, Elliott P, Gallacher J,  
568 Green J, Matthews P, Pell J, et al. UK Biobank: Current status and what it means  
569 for epidemiology. *Health Policy and Technology*. 2012;1:123–126. doi:  
570 10.1016/j.hlpt.2012.07.003.
- 571 14. Sudlow C, Gallacher J, Allen N, Beral V, Burton P, Danesh J, Downey P, Elliott  
572 P, Green J, Landray M, et al. UK biobank: an open access resource for

- 573 identifying the causes of a wide range of complex diseases of middle and old  
574 age. *PLoS Med.* 2015;12:e1001779. doi: 10.1371/journal.pmed.1001779.
- 575 15. Riboli E, Hunt KJ, Slimani N, Ferrari P, Norat T, Fahey M, Charrondière UR,  
576 Hémon B, Casagrande C, Vignat J, et al. European Prospective Investigation  
577 into Cancer and Nutrition (EPIC): study populations and data collection. *Public*  
578 *Health Nutr.* 2002;5:1113–1124. doi: 10.1079/PHN2002394.
- 579 16. Danesh J, Saracci R, Berglund G, Feskens E, Overvad K, Panico S, Thompson  
580 S, Fournier A, Clavel-Chapelon F, Canonico M, et al. EPIC-Heart: the  
581 cardiovascular component of a prospective study of nutritional, lifestyle and  
582 biological factors in 520,000 middle-aged participants from 10 European  
583 countries. *Eur J Epidemiol.* 2007;22:129–141. doi: 10.1007/s10654-006-9096-8.
- 584 17. Langenberg C, Sharp S, Forouhi NG, Franks PW, Schulze MB, Kerrison N,  
585 Ekelund U, Barroso I, Panico S, Tormo MJ, et al. Design and cohort description  
586 of the InterAct Project: an examination of the interaction of genetic and lifestyle  
587 factors on the incidence of type 2 diabetes in the EPIC Study. *Diabetologia.*  
588 2011;54:2272–2282. doi: 10.1007/s00125-011-2182-9.
- 589 18. Zheng J-S, Luan J, Sofianopoulou E, Imamura F, Stewart ID, Day FR, Pietzner  
590 M, Wheeler E, Lotta LA, Gundersen TE, et al. Plasma Vitamin C and Type 2  
591 Diabetes: Genome-Wide Association Study and Mendelian Randomization  
592 Analysis in European Populations. *Diabetes Care.* 2021;44:98–106. doi:  
593 10.2337/dc20-1328.
- 594 19. Collins R. What makes UK Biobank special? *Lancet.* 2012;379:1173–1174. doi:  
595 10.1016/S0140-6736(12)60404-8.
- 596 20. Bycroft C, Freeman C, Petkova D, Band G, Elliott LT, Sharp K, Motyer A,  
597 Vukcevic D, Delaneau O, O’Connell J, et al. Genome-wide genetic data on  
598 ~500,000 UK Biobank participants. *bioRxiv.* 2017. doi: 10.1101/166298.

- 599 21. Onland-Moret NC, van der A DL, van der Schouw YT, Buschers W, Elias SG,  
600 van Gils CH, Koerselman J, Roest M, Grobbee DE, Peeters PHM. Analysis of  
601 case-cohort data: a comparison of different methods. *J Clin Epidemiol*.  
602 2007;60:350–355. doi: 10.1016/j.jclinepi.2006.06.022.
- 603 22. Firth D. Quasi-variances. *Biometrika*. 2004;91:65–80. doi:  
604 10.1093/biomet/91.1.65.
- 605 23. White IR. Multivariate Random-effects Meta-analysis. *Stata J*. 2009;9:40–56. doi:  
606 10.1177/1536867X0900900103.
- 607 24. Privé F, Luu K, Blum MGB, McGrath JJ, Vilhjálmsón BJ. Efficient toolkit  
608 implementing best practices for principal component analysis of population  
609 genetic data. *Bioinformatics*. 2020;36:4449–4457. doi:  
610 10.1093/bioinformatics/btaa520.
- 611 25. Yavorska OO, Burgess S. MendelianRandomization: an R package for  
612 performing Mendelian randomization analyses using summarized data. *Int J*  
613 *Epidemiol*. 2017;46:1734–1739. doi: 10.1093/ije/dyx034.
- 614 26. Verbanck M, Chen C-Y, Neale B, Do R. Detection of widespread horizontal  
615 pleiotropy in causal relationships inferred from Mendelian randomization  
616 between complex traits and diseases. *Nat Genet*. 2018;50:693–698. doi:  
617 10.1038/s41588-018-0099-7.
- 618 27. Dam V, van der Schouw YT, Onland-Moret NC, Groenwold RHH, Peters SAE,  
619 Burgess S, Wood AM, Chirlaque M-D, Moons KGM, Oliver-Williams C, et al.  
620 Association of menopausal characteristics and risk of coronary heart disease: a  
621 pan-European case-cohort analysis. *Int J Epidemiol*. 2019;48:1275–1285. doi:  
622 10.1093/ije/dyz016.
- 623 28. Woodfield R, Grant I, Sudlow CLM. Accuracy of Electronic Health Record Data  
624 for Identifying Stroke Cases in Large-Scale Epidemiological Studies: A

- 625 Systematic Review from the UK Biobank Stroke Outcomes Group. *PLoS One*.  
626 2015;10:e0140533. doi: 10.1371/journal.pone.0140533.
- 627 29. Staiger D, Stock JH. Instrumental Variables Regression with Weak Instruments.  
628 *Econometrica*. 1997;65:557. doi: 10.2307/2171753.
- 629 30. Jung KJ, Kim M-R, Yun YD, Kim HC, Jee SH. Duration of ovarian hormone  
630 exposure and atherosclerotic cardiovascular disease in Korean women: the  
631 Korean Heart Study. *Menopause*. 2016;23:60–66. doi:  
632 10.1097/GME.0000000000000489.
- 633 31. Yang L, Lin L, Kartsonaki C, Guo Y, Chen Y, Bian Z, Xie K, Jin D, Li L, Lv J, et  
634 al. Menopause Characteristics, Total Reproductive Years, and Risk of  
635 Cardiovascular Disease Among Chinese Women. *Circ Cardiovasc Qual*  
636 *Outcomes*. 2017;10. doi: 10.1161/CIRCOUTCOMES.117.004235.
- 637 32. Ley SH, Li Y, Tobias DK, Manson JE, Rosner B, Hu FB, Rexrode KM. Duration  
638 of Reproductive Life Span, Age at Menarche, and Age at Menopause Are  
639 Associated With Risk of Cardiovascular Disease in Women. *J Am Heart Assoc*.  
640 2017;6. doi: 10.1161/JAHA.117.006713.
- 641 33. Lisabeth LD, Beiser AS, Brown DL, Murabito JM, Kelly-Hayes M, Wolf PA. Age  
642 at natural menopause and risk of ischemic stroke: the Framingham heart study.  
643 *Stroke*. 2009;40:1044–1049. doi: 10.1161/STROKEAHA.108.542993.
- 644 34. Gallagher LG, Davis LB, Ray RM, Psaty BM, Gao DL, Checkoway H, Thomas  
645 DB. Reproductive history and mortality from cardiovascular disease among  
646 women textile workers in Shanghai, China. *Int J Epidemiol*. 2011;40:1510–1518.  
647 doi: 10.1093/ije/dyr134.
- 648 35. Lai PMR, Jimenez M, Du R, Rexrode K. Association of Reproductive Life Span  
649 and Age at Menopause With the Risk of Aneurysmal Subarachnoid Hemorrhage.  
650 *Neurology*. 2022;98:e2005-e2012. doi: 10.1212/WNL.0000000000200222.

- 651 36. Iorga A, Cunningham CM, Moazeni S, Ruffenach G, Umar S, Eghbali M. The  
652 protective role of estrogen and estrogen receptors in cardiovascular disease and  
653 the controversial use of estrogen therapy. *Biol Sex Differ.* 2017;8:33. doi:  
654 10.1186/s13293-017-0152-8.
- 655 37. Peters SAE, Woodward M. Oestradiol and the risk of myocardial infarction in  
656 women: a cohort study of UK Biobank participants. *Int J Epidemiol.*  
657 2021;50:1241–1249. doi: 10.1093/ije/dyaa284.
- 658 38. Geistanger A, Arends S, Berding C, Hoshino T, Jeppsson J-O, Little R, Siebelder  
659 C, Weykamp C. Statistical methods for monitoring the relationship between the  
660 IFCC reference measurement procedure for hemoglobin A1c and the designated  
661 comparison methods in the United States, Japan, and Sweden. *Clin Chem.*  
662 2008;54:1379–1385. doi: 10.1373/clinchem.2008.103556.
- 663 39. Peters T, Brage S, Westgate K, Franks PW, Gradmark A, Tormo Diaz MJ,  
664 Huerta JM, Bendinelli B, Vigl M, Boeing H, et al. Validity of a short questionnaire  
665 to assess physical activity in 10 European countries. *Eur J Epidemiol.*  
666 2012;27:15–25. doi: 10.1007/s10654-011-9625-y.
- 667 40. Guidelines for data processing analysis of the International Physical Activity  
668 Questionnaire (IPAQ) - Short and long forms.
- 669 41. White IR, Royston P. Imputing missing covariate values for the Cox model. *Stat*  
670 *Med.* 2009;28:1982–1998. doi: 10.1002/sim.3618.
- 671 42. Burgess S, White IR, Resche-Rigon M, Wood AM. Combining multiple imputation  
672 and meta-analysis with individual participant data. *Stat Med.* 2013;32:4499–  
673 4514. doi: 10.1002/sim.5844.
- 674



## 675 **Figure legends**

676 **Figure 1. Participant flow chart.** \*Excluded because follow-up for stroke was  
677 unavailable in French centers. †Excluded because important covariates were not  
678 measured in Norwegian centers. ‡Excluded because of administrative constraints. §Of  
679 these, 5,292 belonged to the sub-cohort and 2,591 were stroke cases outside the sub-  
680 cohort. ||Of these, 4,127 belonged to the sub-cohort and 1,616 were stroke cases  
681 outside the sub-cohort.

682 **Figure 2. Association of age at menopause and risk of stroke.** Hazard ratios are  
683 adjusted for age, smoking status, body mass index, glycated hemoglobin, total  
684 cholesterol, hypertension, ever use of hormone replacement therapy, and age at  
685 menarche. Dots indicate point estimates and whiskers 95% confidence intervals for  
686 the categories <40, 40 to <45, 45 to <50, 50 to <55, and ≥55 years of age at  
687 menopause. Age at menopause from 50 to <55 years was used as reference category.  
688 Restricted cubic splines are based on three knots at 45, 50, and 55 years of age at  
689 menopause using an age of 50 years at menopause as reference.

690 **Figure 3. Mendelian Randomization analysis on genetically proxied age at**  
691 **menopause and risk of stroke.** Hazard ratios are per five years younger genetically  
692 proxied age at menopause. Abbreviations: CI, confidence interval; IVW, inverse  
693 variance weighted.

694 **Tables**

695 **Table 1. Baseline characteristics.**

| Characteristic                     | Overall<br>(n=201,653*) |                                         | EPIC-CVD<br>(n=5,292*) |                                            | UK Biobank<br>(n=196,361) |                                         |
|------------------------------------|-------------------------|-----------------------------------------|------------------------|--------------------------------------------|---------------------------|-----------------------------------------|
|                                    | Total<br>No.            | Mean ± SD,<br>median [IQR],<br>No. (%†) | Total<br>No.           | Mean ± SD,<br>median<br>[IQR], No.<br>(%†) | Total<br>No.              | Mean ± SD,<br>median [IQR],<br>No. (%†) |
| <b>Stroke risk factors</b>         |                         |                                         |                        |                                            |                           |                                         |
| Age, years                         | 201,653                 | 58.9 ± 5.8                              | 5,292                  | 58.0 ± 6.4                                 | 196,361                   | 59.9 ± 5.7                              |
| Systolic BP, mmHg                  | 189,007                 | 137.1 ± 19.2                            | 4,296                  | 135.7 ± 20.0                               | 184,711                   | 138.4 ± 19.2                            |
| Diastolic BP, mmHg                 | 189,009                 | 81.6 ± 9.9                              | 4,296                  | 82.0 ± 10.4                                | 184,713                   | 81.2 ± 9.9                              |
| Hypertension                       | 200,858                 | 103,069 (51.3%)                         | 5,245                  | 2,362 (45.0%)                              | 195,613                   | 100,707 (51.5%)                         |
| Body mass index, kg/m <sup>2</sup> | 200,628                 | 26.8 ± 5.1                              | 5,258                  | 26.4 ± 4.6                                 | 195,370                   | 27.3 ± 5.1                              |
| Education                          | 197,661                 |                                         | 5,182                  |                                            | 192,479                   |                                         |
| Low                                |                         | 43,350 (21.9%)                          |                        | 2,026 (39.1%)                              |                           | 41,324 (21.5%)                          |
| Medium                             |                         | 48,764 (24.7%)                          |                        | 615 (11.9%)                                |                           | 48,149 (25.0%)                          |
| High                               |                         | 104,994 (53.1%)                         |                        | 1,988 (38.4%)                              |                           | 103,006 (53.5%)                         |
| Smoking status                     | 200,560                 |                                         | 5,254                  |                                            | 195,306                   |                                         |
| Never                              |                         | 116,329 (58.0%)                         |                        | 3,071 (58.5%)                              |                           | 113,258 (58.0%)                         |
| Ex                                 |                         | 66,778 (33.3%)                          |                        | 1,092 (20.8%)                              |                           | 65,686 (33.6%)                          |
| Current                            |                         | 17,453 (8.7%)                           |                        | 1,091 (20.8%)                              |                           | 16,362 (8.4%)                           |
| Total cholesterol, mmol/L          | 188,029                 | 6.2 ± 1.1                               | 5,049                  | 6.3 ± 1.2                                  | 182,980                   | 6.0 ± 1.1                               |
| HDL cholesterol, mmol/L            | 171,617                 | 1.6 ± 0.4                               | 5,049                  | 1.6 ± 0.4                                  | 166,568                   | 1.6 ± 0.4                               |
| Triglycerides, mmol/L              | 187,916                 | 1.4 [1.0, 2.0]                          | 5,046                  | 1.2 [0.8, 1.6]                             | 182,870                   | 1.4 [1.0, 2.0]                          |
| HbA1c, %                           | 186,905                 | 5.6 ± 0.5                               | 5,194                  | 5.6 ± 0.7                                  | 181,711                   | 5.5 ± 0.5                               |
| <b>Female-specific factors</b>     |                         |                                         |                        |                                            |                           |                                         |
| Age at menopause, years            | 189,095                 | 47.8 ± 6.2                              | 4,754                  | 47.3 ± 6.4                                 | 184,341                   | 48.4 ± 6.2                              |
| Surgical menopause                 | 201,653                 | 45,193 (22.4%)                          | 5,292                  | 1,235 (23.3%)                              | 196,361                   | 43,958 (22.4%)                          |
| Ever use of HRT                    | 200,206                 | 100,203 (50.0%)                         | 4,722                  | 1,733 (36.7%)                              | 195,484                   | 98,470 (50.4%)                          |
| Ever use of OCP                    | 200,736                 | 155,303 (77.4%)                         | 5,206                  | 2,329 (44.7%)                              | 195,530                   | 152,974 (78.2%)                         |
| Age at menarche, years             | 195,496                 | 13.2 ± 1.6                              | 5,156                  | 13.4 ± 1.6                                 | 190,340                   | 12.9 ± 1.6                              |

696 \*Only participants of the EPIC-CVD sub-cohort were included in this table. †The denominator for all  
697 percentages was the number of postmenopausal women without missing values in the respective  
698 variable. Abbreviations: BP, blood pressure; OCP, oral contraceptive pill; HbA1c, glycated hemoglobin;  
699 HRT, hormone replacement therapy; IQR, interquartile range; SD, standard deviation.

700 **Table 2. Association between age at menopause and risk of stroke in the EPIC-**  
 701 **CVD and UK Biobank studies (n=204,244).**

| Outcome/Age at menopause (years) | No. of cases | Model 1          |                    | Model 2          |                    | Model 3          |                    |
|----------------------------------|--------------|------------------|--------------------|------------------|--------------------|------------------|--------------------|
|                                  |              | HR (95% CI)      | P <sub>trend</sub> | HR (95% CI)      | P <sub>trend</sub> | HR (95% CI)      | P <sub>trend</sub> |
| <b>Stroke</b>                    |              |                  |                    |                  |                    |                  |                    |
| <40                              | 700          | 1.54 (1.36-1.75) |                    | 1.41 (1.27-1.58) |                    | 1.42 (1.28-1.56) |                    |
| 40 to<45                         | 891          | 1.31 (1.21-1.41) |                    | 1.24 (1.15-1.33) |                    | 1.23 (1.14-1.33) |                    |
| 45 to <50                        | 1,742        | 1.13 (1.05-1.23) | <0.001             | 1.10 (1.02-1.19) | <0.001             | 1.10 (1.02-1.19) | <0.001             |
| 50 to <55                        | 2,623        | 1.00 (0.96-1.04) |                    | 1.00 (0.96-1.04) |                    | 1.00 (0.96-1.04) |                    |
| ≥55                              | 814          | 0.96 (0.83-1.10) |                    | 0.95 (0.83-1.10) |                    | 0.96 (0.84-1.10) |                    |
| per 5 years younger              | 6,770        | 1.12 (1.10-1.15) |                    | 1.10 (1.07-1.12) |                    | 1.09 (1.07-1.12) |                    |
| <b>Ischemic stroke</b>           |              |                  |                    |                  |                    |                  |                    |
| <40                              | 534          | 1.59 (1.41-1.80) |                    | 1.43 (1.28-1.58) |                    | 1.43 (1.30-1.57) |                    |
| 40 to<45                         | 653          | 1.29 (1.15-1.45) |                    | 1.21 (1.07-1.36) |                    | 1.20 (1.07-1.36) |                    |
| 45 to <50                        | 1,350        | 1.16 (1.08-1.24) | <0.001             | 1.12 (1.05-1.20) | <0.001             | 1.12 (1.05-1.20) | <0.001             |
| 50 to <55                        | 1,995        | 1.00 (0.95-1.05) |                    | 1.00 (0.95-1.05) |                    | 1.00 (0.94-1.06) |                    |
| ≥55                              | 623          | 0.95 (0.79-1.16) |                    | 0.94 (0.77-1.15) |                    | 0.95 (0.78-1.16) |                    |
| per 5 years younger              | 5,155        | 1.12 (1.10-1.15) |                    | 1.09 (1.07-1.12) |                    | 1.09 (1.06-1.13) |                    |
| <b>Hemorrhagic stroke</b>        |              |                  |                    |                  |                    |                  |                    |
| <40                              | 166          | 1.37 (1.03-1.81) |                    | 1.32 (0.97-1.79) |                    | 1.33 (0.99-1.80) |                    |
| 40 to<45                         | 238          | 1.32 (1.03-1.69) |                    | 1.29 (1.00-1.67) |                    | 1.30 (1.01-1.68) |                    |
| 45 to <50                        | 392          | 1.08 (0.92-1.25) | 0.007              | 1.06 (0.91-1.22) | 0.036              | 1.06 (0.91-1.23) | 0.022              |
| 50 to <55                        | 628          | 1.00 (0.93-1.08) |                    | 1.00 (0.92-1.09) |                    | 1.00 (0.92-1.08) |                    |
| ≥55                              | 191          | 0.97 (0.83-1.13) |                    | 1.00 (0.85-1.17) |                    | 0.99 (0.85-1.16) |                    |
| per 5 years younger              | 1,615        | 1.11 (1.06-1.17) |                    | 1.09 (1.03-1.16) |                    | 1.10 (1.04-1.16) |                    |
| <b>Intracerebral hemorrhage</b>  |              |                  |                    |                  |                    |                  |                    |
| <40                              | 102          | 1.52 (1.25-1.86) |                    | 1.50 (1.23-1.84) |                    | 1.53 (1.25-1.87) |                    |
| 40 to<45                         | 145          | 1.38 (1.16-1.65) |                    | 1.37 (1.15-1.64) |                    | 1.38 (1.16-1.65) |                    |
| 45 to <50                        | 224          | 1.02 (0.88-1.17) | <0.001             | 1.02 (0.88-1.17) | <0.001             | 1.02 (0.89-1.17) | <0.001             |
| 50 to <55                        | 394          | 1.00 (0.90-1.11) |                    | 1.00 (0.90-1.12) |                    | 1.00 (0.90-1.12) |                    |
| ≥55                              | 111          | 0.84 (0.69-1.03) |                    | 0.85 (0.69-1.04) |                    | 0.85 (0.69-1.04) |                    |
| per 5 years younger              | 976          | 1.15 (1.09-1.21) |                    | 1.14 (1.08-1.20) |                    | 1.14 (1.08-1.20) |                    |
| <b>Subarachnoid hemorrhage</b>   |              |                  |                    |                  |                    |                  |                    |
| <40                              | 64           | 1.19 (0.71-2.00) |                    | 1.08 (0.59-1.98) |                    | 1.10 (0.62-1.96) |                    |
| 40 to<45                         | 93           | 1.20 (0.68-2.11) |                    | 1.15 (0.63-2.08) |                    | 1.15 (0.64-2.06) |                    |
| 45 to <50                        | 168          | 1.17 (0.94-1.45) | 0.615              | 1.11 (0.94-1.31) | 0.952              | 1.11 (0.93-1.32) | 0.923              |
| 50 to <55                        | 234          | 1.00 (0.81-1.24) |                    | 1.00 (0.81-1.24) |                    | 1.00 (0.81-1.24) |                    |
| ≥55                              | 80           | 1.26 (0.96-1.65) |                    | 1.33 (0.96-1.84) |                    | 1.33 (0.96-1.83) |                    |
| per 5 years younger              | 639          | 1.03 (0.88-1.20) |                    | 1.00 (0.82-1.21) |                    | 1.00 (0.84-1.20) |                    |

702 Model 1 is adjusted for age; Model 2 is additionally adjusted for smoking status, body mass index,  
 703 HbA1c, total cholesterol, and hypertension; Model 3 is additionally adjusted for ever use of hormone  
 704 replacement therapy and age at menarche. Confidence intervals for each age at menopause category  
 705 are presented using quasi variances in order to enhance the comparison between individual categories.  
 706 Age at menopause from 50 to <55 years was used as reference category. P<sub>trend</sub> indicates P-value for  
 707 linear trend. Abbreviations: CI, confidence interval; HR, hazard ratio.

708 **Figures**

709 **Figure 1. Participant flow chart.**

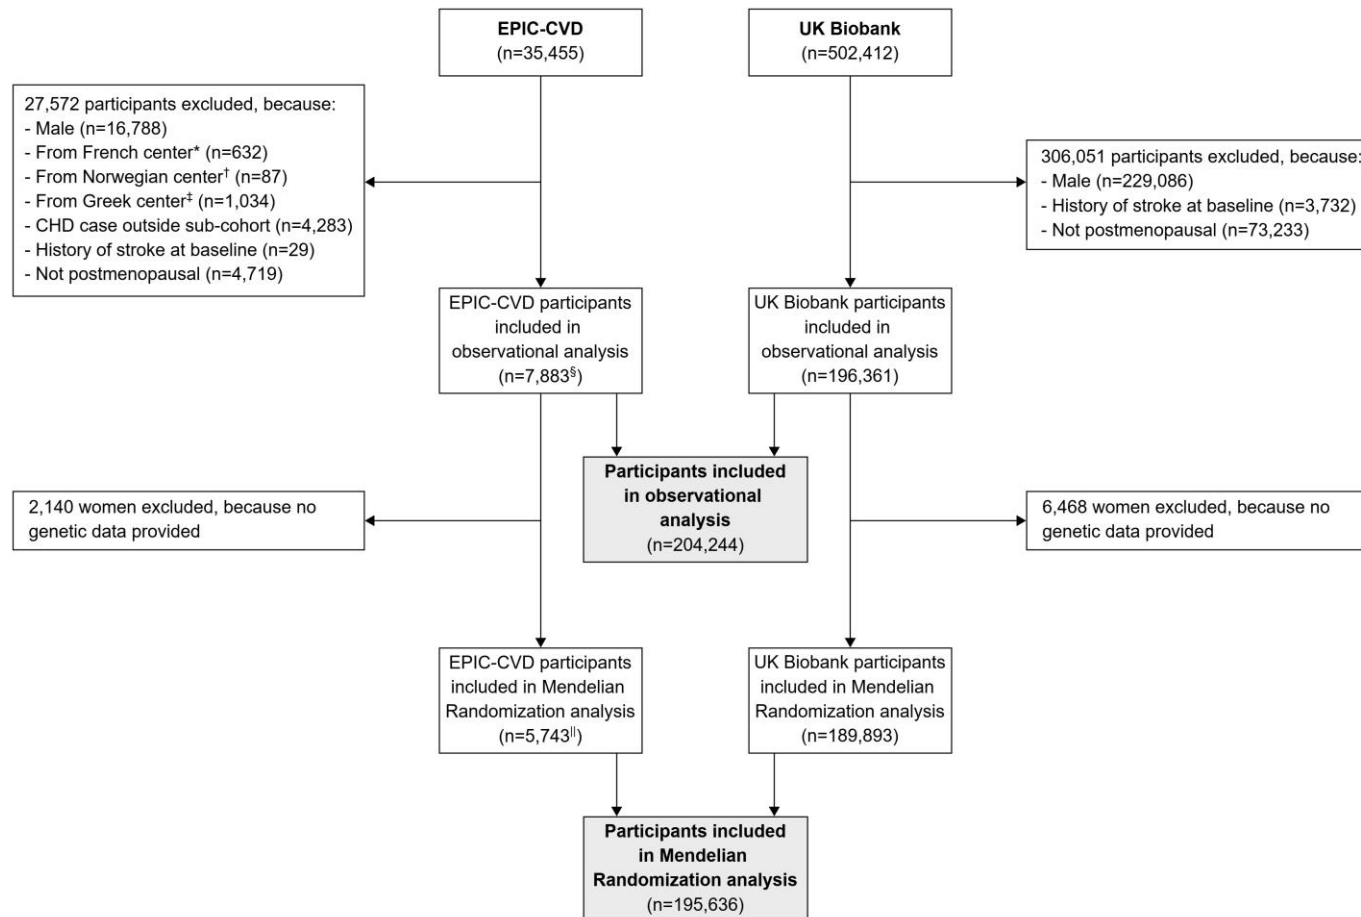

710  
 711 \*Excluded because follow-up for stroke was unavailable in French centers. †Excluded because important covariates were not measured in Norwegian centers.  
 712 ‡Excluded because of administrative constraints. §Of these, 5,292 belonged to the sub-cohort and 2,591 were stroke cases outside the sub-cohort. ||Of these,  
 713 4,127 belonged to the sub-cohort and 1,616 were stroke cases outside the sub-cohort.

714 **Figure 2. Association of age at menopause and risk of stroke.**

715

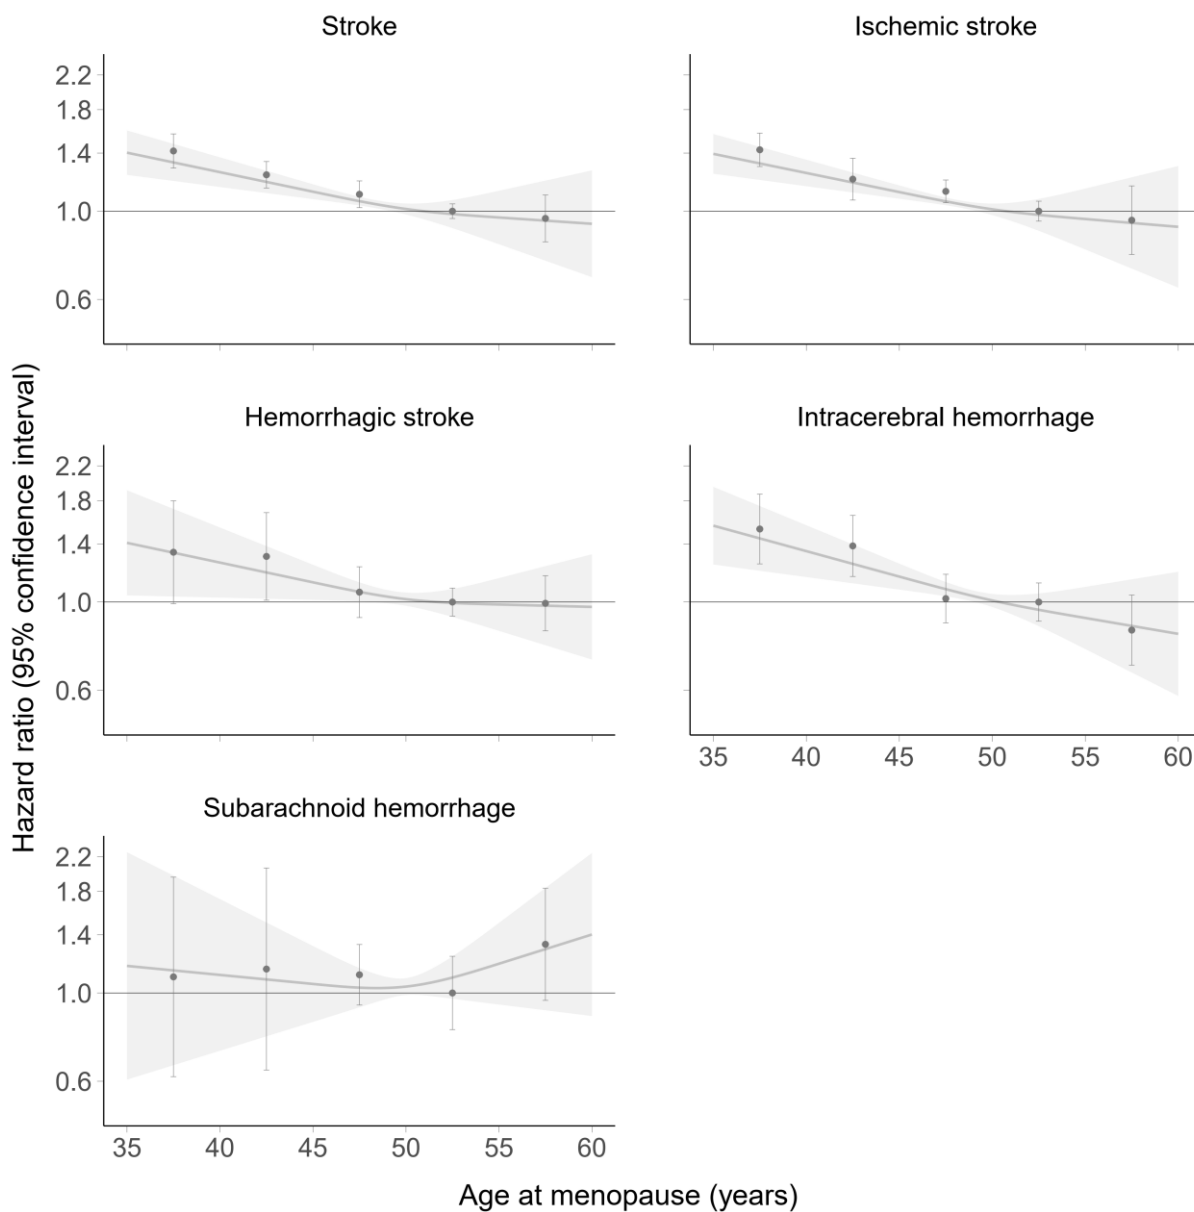

716

717 Hazard ratios are adjusted for age, smoking status, body mass index, glycated hemoglobin, total  
 718 cholesterol, hypertension, ever use of hormone replacement therapy, and age at menarche. Dots  
 719 indicate point estimates and whiskers 95% confidence intervals for the categories <40, 40 to <45, 45 to  
 720 <50, 50 to <55, and ≥55 years of age at menopause. Age at menopause from 50 to <55 years was used  
 721 as reference category. Restricted cubic splines are based on three knots at 45, 50, and 55 years of age  
 722 at menopause using an age of 50 years at menopause as reference.

723 **Figure 3. Mendelian Randomization analysis on genetically proxied age at**  
 724 **menopause and risk of stroke.**

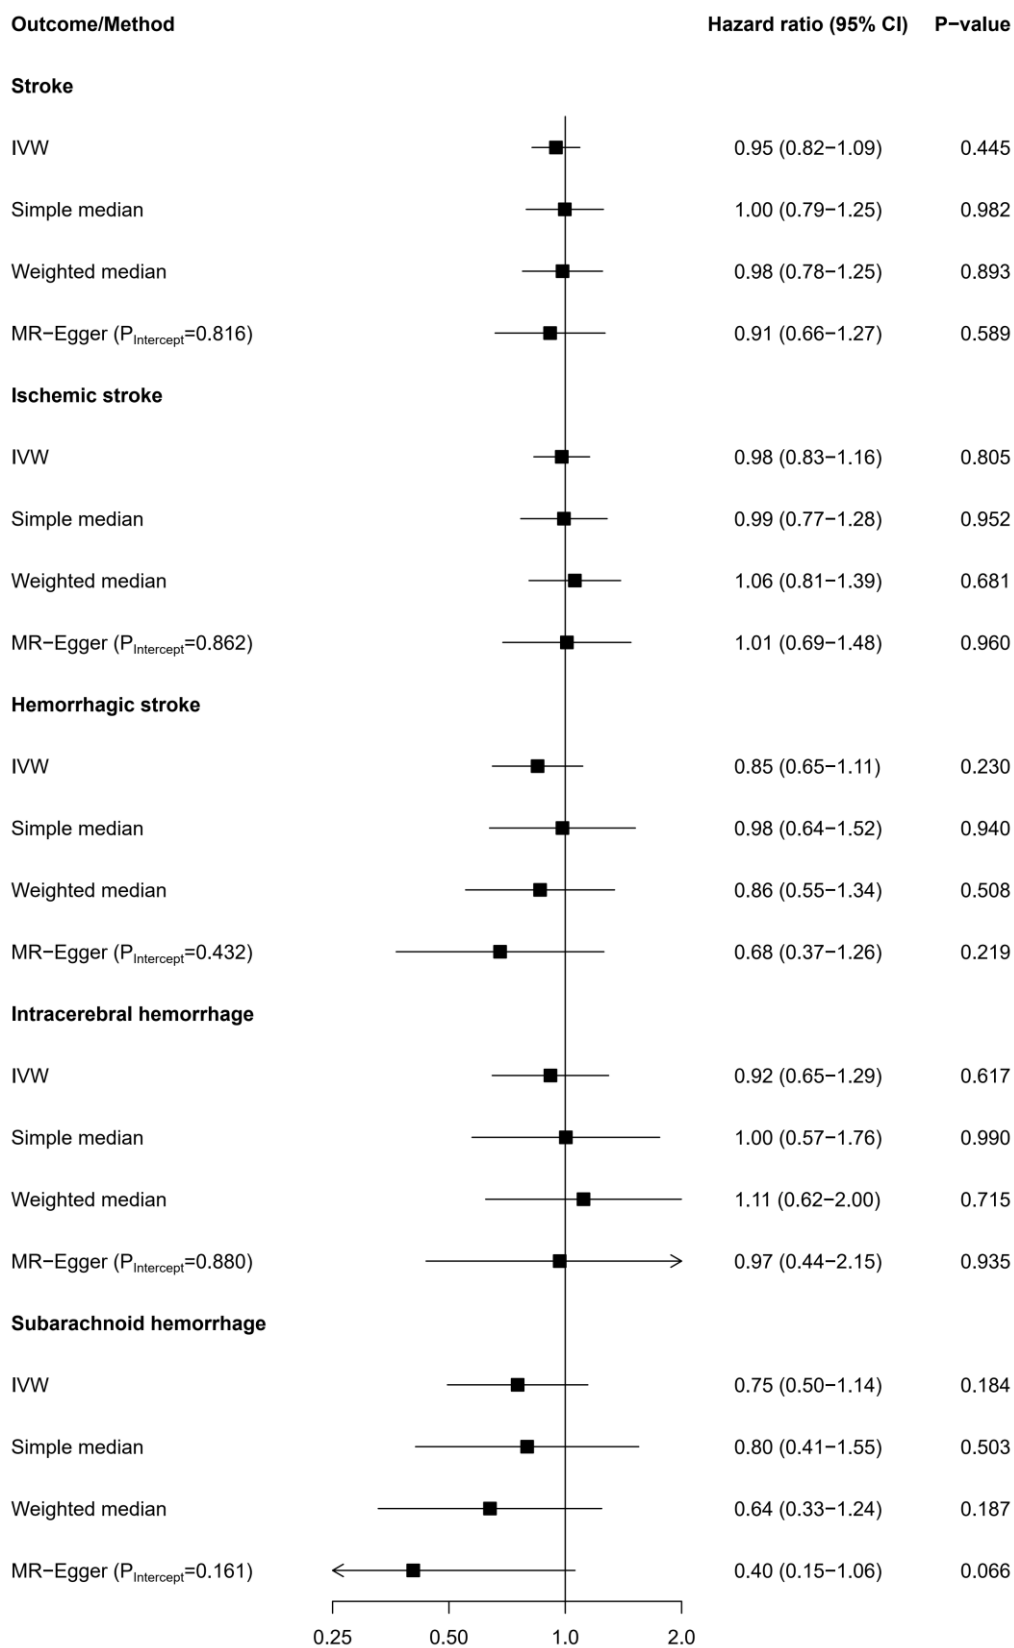

725 Hazard ratios are per five years younger genetically proxied age at menopause. Abbreviations: CI,  
 726 confidence interval; IVW, inverse variance weighted.  
 727

728

## SUPPLEMENTAL MATERIAL

729 Age at menopause and the risk of stroke: Observational and Mendelian

730 Randomization analysis in 204,244 postmenopausal women

731

*Tschiderer et al.*

## 732 **Supplemental Methods**

### 733 **Assessment and definition of additional variables**

734 In the UK Biobank, hypertension was defined as self-reported intake of  
735 antihypertensive medication or as having a systolic blood pressure >140 mmHg or a  
736 diastolic blood pressure >90 mmHg taking into account the average of two blood  
737 pressure measures taken a few moments apart. In EPIC-CVD, hypertension was  
738 defined as having a systolic blood pressure >140 mmHg, a diastolic blood pressure  
739 >90 mmHg, a self-reported history of hypertension, or as self-reported intake of  
740 antihypertensive medication. In both studies, body mass index was calculated by  
741 dividing weight in kg by height in m<sup>2</sup>. In EPIC-CVD, low socioeconomic status was  
742 defined according to education, whereby no or primary schooling indicated low,  
743 secondary schooling indicated medium, and vocational schooling or university  
744 indicated high socioeconomic status. In the UK Biobank, socioeconomic status was  
745 defined according to thirds of the Townsend index, whereby values ≤-3.2 indicated  
746 low, >-3.2 and ≤-0.803 indicated medium, and >-0.803 indicated high socioeconomic  
747 status. Smoking was divided into never, ex, and current tobacco smoking. Lipid levels,  
748 including total cholesterol, high-density lipoprotein cholesterol, and triglycerides, were  
749 measured in serum samples at baseline on a Roche auto-analyzer at Stichting  
750 Huisartsen Laboratorium (Etten-Leur, The Netherlands) in EPIC-CVD and using a  
751 Beckman Coulter AU5800 platform in UK Biobank. Erythrocyte glycosylated hemoglobin  
752 (HbA1c) was measured using the Tosoh-G8 HPLC analyzer (Tosoh Bioscience,  
753 Japan) in EPIC-CVD and with Bio-Rad Variant II Turbo analyzers in the UK Biobank.  
754 In the UK Biobank, HbA1c was transformed from mmol/mol to % in using the formula  
755  $[\text{HbA1c in \%}] = 2.15 + 0.0915 \cdot [\text{HbA1c in mmol/mol}]$ .<sup>38</sup> Physical activity was defined  
756 according to the Cambridge physical activity index in EPIC-CVD<sup>39</sup> and according to



757 the International Physical Activity Questionnaire (IPAQ) scoring protocol (short  
758 forms)<sup>40</sup> in the UK Biobank. In addition, ever use of hormone replacement therapy and  
759 ever use of oral contraceptive pill was self-reported in both studies. Finally, age at  
760 menarche was defined as age at first menstrual period, which was self-reported in  
761 both studies.

## 762 **Multiple imputation of missing values**

763 We imputed missing values using multiple imputation by chained equations with 14  
764 datasets and 30 iterations. We included the following variables into our imputation  
765 model: total cholesterol, high-density lipoprotein cholesterol, triglycerides,  
766 apolipoprotein A1, apolipoprotein B, HbA1c, ever use of oral contraceptive pill, age at  
767 menarche, age at menopause, body mass index, history of diabetes mellitus,  
768 hypertension, ever use of hormone replacement therapy, smoking status, age at  
769 baseline, menopausal status, physical activity, type of menopause, incident stroke  
770 indicator, incident ischemic stroke indicator, incident hemorrhagic stroke indicator,  
771 incident intracerebral hemorrhage indicator, incident subarachnoid hemorrhage  
772 indicator, the Nelson-Aalen estimator for stroke (weighted by the sampling fraction for  
773 EPIC-CVD)<sup>41</sup> for both the UK Biobank and EPIC-CVD. Additionally, we used the  
774 variables systolic blood pressure, diastolic blood pressure, and Townsend index for  
775 the UK Biobank and the variables center, country, and education for EPIC-CVD. In  
776 case the Pearson correlation coefficient between two predictors was higher than 0.7  
777 or lower than -0.7, we only used the predictor with the higher correlation coefficient  
778 with the imputed variable. Furthermore, we implemented passive multiple imputation  
779 for the variable representing categories of age at menopause. For the meta-analysis  
780 we used within-study multiple imputation as suggested by Burgess et al.<sup>42</sup>, i.e., we

781 multiply imputed missing values in each study, combined the results by Rubin's rule,  
782 and applied random-effects meta-analysis to combine the individual study results.

### 783 **Selection of SNPs**

784 The selection process of SNPs included in the Mendelian Randomization analysis is  
785 demonstrated in **eFigure 3**. A detailed list of SNPs included is provided in **eTable 1**.  
786 Of the 290 SNPs identified by the GWAS,<sup>11</sup> we excluded (1) 63 SNPs because data  
787 were not available in EPIC-CVD; (2) 16 SNPs because they were palindromic and had  
788 an allele frequency between 0.3 and 0.7 obtained from either the summary data from  
789 the GWAS, within UK Biobank, or EPIC-CVD; and (3) 45 SNPs because they were  
790 rare with a minor allele frequency <0.1. Finally, we included 166 SNPs into our  
791 instrumental variable to genetically proxy age at menopause. Additionally, we checked  
792 whether the genetic variants were reported on the correct allele and harmonized the  
793 data accordingly.

794 **Supplemental Tables**

795 **eTable 1. Selection of SNPs.**

| SNPs obtained from GWAS | SNPs in main analysis after exclusion, because |                                                      |                             | SNPs in sensitivity analysis after exclusion, because |
|-------------------------|------------------------------------------------|------------------------------------------------------|-----------------------------|-------------------------------------------------------|
|                         | data not available in EPIC-CVD                 | palindromic and allele frequency between 0.3 and 0.7 | minor allele frequency <0.1 | minor allele frequency <0.01                          |
| rs200448                | rs200448                                       | rs200448                                             | rs200448                    | rs200448                                              |
| rs9438982               | rs9438982                                      | rs9438982                                            | rs9438982                   | rs9438982                                             |
| rs12046563              | rs12046563                                     | rs12046563                                           | rs12046563                  | rs12046563                                            |
| rs57259875              | rs57259875                                     | rs57259875                                           | rs57259875                  | rs57259875                                            |
| rs112869704             | rs112869704                                    | rs112869704                                          | rs112869704                 | rs112869704                                           |
| rs12133213              | –                                              | –                                                    | –                           | –                                                     |
| rs11102802              | rs11102802                                     | rs11102802                                           | rs11102802                  | rs11102802                                            |
| rs72708144              | rs72708144                                     | rs72708144                                           | –                           | rs72708144                                            |
| rs2736609               | rs2736609                                      | rs2736609                                            | rs2736609                   | rs2736609                                             |
| rs41272475              | rs41272475                                     | rs41272475                                           | –                           | –                                                     |
| rs371125724             | –                                              | –                                                    | –                           | –                                                     |
| rs11582336              | rs11582336                                     | rs11582336                                           | rs11582336                  | rs11582336                                            |
| rs1044595               | rs1044595                                      | rs1044595                                            | rs1044595                   | rs1044595                                             |
| rs7515939               | rs7515939                                      | –                                                    | –                           | –                                                     |
| rs4653680               | –                                              | –                                                    | –                           | –                                                     |
| rs7414807               | rs7414807                                      | rs7414807                                            | rs7414807                   | rs7414807                                             |
| rs1635506               | rs1635506                                      | rs1635506                                            | rs1635506                   | rs1635506                                             |
| rs72755295              | rs72755295                                     | rs72755295                                           | –                           | rs72755295                                            |
| rs851797                | rs851797                                       | rs851797                                             | rs851797                    | rs851797                                              |
| rs7539755               | rs7539755                                      | rs7539755                                            | rs7539755                   | rs7539755                                             |
| rs7779                  | rs7779                                         | rs7779                                               | –                           | rs7779                                                |
| rs112866529             | rs112866529                                    | rs112866529                                          | rs112866529                 | rs112866529                                           |
| rs780088                | rs780088                                       | rs780088                                             | rs780088                    | rs780088                                              |
| rs12053063              | rs12053063                                     | rs12053063                                           | rs12053063                  | rs12053063                                            |
| rs10198789              | rs10198789                                     | rs10198789                                           | rs10198789                  | rs10198789                                            |
| rs67600408              | rs67600408                                     | rs67600408                                           | –                           | rs67600408                                            |
| rs17425341              | rs17425341                                     | rs17425341                                           | rs17425341                  | rs17425341                                            |
| rs76928871              | rs76928871                                     | rs76928871                                           | rs76928871                  | rs76928871                                            |
| rs2293269               | rs2293269                                      | –                                                    | –                           | –                                                     |
| rs199638788             | –                                              | –                                                    | –                           | –                                                     |
| rs62156756              | rs62156756                                     | rs62156756                                           | rs62156756                  | rs62156756                                            |
| rs4852777               | rs4852777                                      | –                                                    | –                           | –                                                     |
| rs67893326              | rs67893326                                     | rs67893326                                           | rs67893326                  | rs67893326                                            |
| rs59854799              | –                                              | –                                                    | –                           | –                                                     |
| rs6727266               | rs6727266                                      | rs6727266                                            | rs6727266                   | rs6727266                                             |
| rs72827480              | rs72827480                                     | rs72827480                                           | rs72827480                  | rs72827480                                            |
| rs6430545               | rs6430545                                      | –                                                    | –                           | –                                                     |
| rs16830019              | rs16830019                                     | rs16830019                                           | rs16830019                  | rs16830019                                            |
| rs4668354               | rs4668354                                      | –                                                    | –                           | –                                                     |
| rs201478184             | –                                              | –                                                    | –                           | –                                                     |
| rs6719012               | rs6719012                                      | rs6719012                                            | rs6719012                   | rs6719012                                             |
| rs4972504               | rs4972504                                      | rs4972504                                            | rs4972504                   | rs4972504                                             |
| rs72934556              | rs72934556                                     | rs72934556                                           | rs72934556                  | rs72934556                                            |
| rs540836853             | –                                              | –                                                    | –                           | –                                                     |
| rs6736096               | rs6736096                                      | rs6736096                                            | rs6736096                   | rs6736096                                             |
| rs7558434               | rs7558434                                      | rs7558434                                            | rs7558434                   | rs7558434                                             |
| rs62193239              | rs62193239                                     | rs62193239                                           | rs62193239                  | rs62193239                                            |
| rs606920                | rs606920                                       | rs606920                                             | rs606920                    | rs606920                                              |
| rs12636454              | rs12636454                                     | rs12636454                                           | rs12636454                  | rs12636454                                            |

|             |             |             |             |             |
|-------------|-------------|-------------|-------------|-------------|
| rs62244773  | rs62244773  | rs62244773  | rs62244773  | rs62244773  |
| rs12487736  | rs12487736  | rs12487736  | rs12487736  | rs12487736  |
| rs1264191   | rs1264191   | rs1264191   | rs1264191   | rs1264191   |
| rs34675186  | —           | —           | —           | —           |
| rs9968117   | rs9968117   | rs9968117   | rs9968117   | rs9968117   |
| rs2885255   | rs2885255   | —           | —           | —           |
| rs7610102   | —           | —           | —           | —           |
| rs4679244   | rs4679244   | rs4679244   | rs4679244   | rs4679244   |
| rs6793835   | rs6793835   | rs6793835   | rs6793835   | rs6793835   |
| rs1545597   | rs1545597   | rs1545597   | rs1545597   | rs1545597   |
| rs10154963  | rs10154963  | rs10154963  | rs10154963  | rs10154963  |
| rs344018    | rs344018    | rs344018    | rs344018    | rs344018    |
| rs72268838  | —           | —           | —           | —           |
| rs10804920  | rs10804920  | rs10804920  | rs10804920  | rs10804920  |
| rs979481644 | —           | —           | —           | —           |
| rs13070791  | rs13070791  | rs13070791  | rs13070791  | rs13070791  |
| rs3796624   | rs3796624   | rs3796624   | rs3796624   | rs3796624   |
| rs2052160   | rs2052160   | rs2052160   | rs2052160   | rs2052160   |
| rs190043078 | —           | —           | —           | —           |
| rs6824237   | rs6824237   | rs6824237   | rs6824237   | rs6824237   |
| rs2581458   | rs2581458   | rs2581458   | rs2581458   | rs2581458   |
| rs76540949  | —           | —           | —           | —           |
| rs12651246  | rs12651246  | rs12651246  | rs12651246  | rs12651246  |
| rs7698733   | —           | —           | —           | —           |
| rs145615497 | rs145615497 | rs145615497 | —           | rs145615497 |
| rs6810489   | rs6810489   | rs6810489   | rs6810489   | rs6810489   |
| rs35713108  | —           | —           | —           | —           |
| rs112898082 | rs112898082 | rs112898082 | rs112898082 | rs112898082 |
| rs2139178   | rs2139178   | rs2139178   | rs2139178   | rs2139178   |
| rs9990489   | rs9990489   | rs9990489   | rs9990489   | rs9990489   |
| rs274701    | rs274701    | rs274701    | rs274701    | rs274701    |
| rs80167918  | rs80167918  | rs80167918  | —           | rs80167918  |
| rs62356073  | rs62356073  | rs62356073  | rs62356073  | rs62356073  |
| rs17206591  | rs17206591  | rs17206591  | rs17206591  | rs17206591  |
| rs7728833   | rs7728833   | rs7728833   | rs7728833   | rs7728833   |
| rs10070308  | rs10070308  | rs10070308  | rs10070308  | rs10070308  |
| rs10477172  | rs10477172  | rs10477172  | rs10477172  | rs10477172  |
| rs888694    | rs888694    | rs888694    | —           | rs888694    |
| rs11744866  | rs11744866  | rs11744866  | rs11744866  | rs11744866  |
| rs35813302  | rs35813302  | rs35813302  | rs35813302  | rs35813302  |
| rs2241584   | rs2241584   | rs2241584   | rs2241584   | rs2241584   |
| rs353478    | rs353478    | rs353478    | rs353478    | rs353478    |
| rs76623841  | rs76623841  | rs76623841  | —           | rs76623841  |
| rs9348724   | rs9348724   | rs9348724   | rs9348724   | rs9348724   |
| rs72823382  | rs72823382  | rs72823382  | rs72823382  | rs72823382  |
| rs4716056   | rs4716056   | rs4716056   | rs4716056   | rs4716056   |
| rs9348752   | rs9348752   | rs9348752   | —           | rs9348752   |
| rs6930435   | rs6930435   | rs6930435   | rs6930435   | rs6930435   |
| rs3130040   | rs3130040   | rs3130040   | —           | rs3130040   |
| rs4143333   | rs4143333   | rs4143333   | —           | rs4143333   |
| rs2844466   | rs2844466   | rs2844466   | rs2844466   | rs2844466   |
| rs9272211   | —           | —           | —           | —           |
| rs9272982   | —           | —           | —           | —           |
| rs7748483   | rs7748483   | rs7748483   | —           | rs7748483   |
| rs9470134   | —           | —           | —           | —           |
| rs515650    | —           | —           | —           | —           |
| rs113967617 | rs113967617 | rs113967617 | rs113967617 | rs113967617 |
| rs2147220   | rs2147220   | rs2147220   | rs2147220   | rs2147220   |
| rs6569648   | rs6569648   | rs6569648   | rs6569648   | rs6569648   |
| rs140381358 | —           | —           | —           | —           |
| rs67149731  | —           | —           | —           | —           |

|                  |             |             |            |             |
|------------------|-------------|-------------|------------|-------------|
| rs61065130       | –           | –           | –          | –           |
| rs11767307       | rs11767307  | rs11767307  | rs11767307 | rs11767307  |
| rs1826838        | rs1826838   | rs1826838   | rs1826838  | rs1826838   |
| rs62445870       | rs62445870  | rs62445870  | –          | rs62445870  |
| rs375846854      | –           | –           | –          | –           |
| rs10255049       | rs10255049  | rs10255049  | rs10255049 | rs10255049  |
| rs2023778        | rs2023778   | rs2023778   | rs2023778  | rs2023778   |
| rs2056726        | rs2056726   | rs2056726   | rs2056726  | rs2056726   |
| rs2392836        | rs2392836   | rs2392836   | rs2392836  | rs2392836   |
| rs4731541        | rs4731541   | –           | –          | –           |
| rs112190116      | –           | –           | –          | –           |
| rs2013           | rs2013      | rs2013      | rs2013     | rs2013      |
| rs2061834        | rs2061834   | rs2061834   | rs2061834  | rs2061834   |
| rs3750243        | rs3750243   | rs3750243   | rs3750243  | rs3750243   |
| rs6473979        | rs6473979   | rs6473979   | –          | rs6473979   |
| rs3735828        | –           | –           | –          | –           |
| rs73264416       | rs73264416  | rs73264416  | –          | rs73264416  |
| rs35529153       | –           | –           | –          | –           |
| rs117431243      | –           | –           | –          | –           |
| rs1467044        | rs1467044   | rs1467044   | rs1467044  | rs1467044   |
| rs6470598        | rs6470598   | rs6470598   | rs6470598  | rs6470598   |
| rs1476164        | rs1476164   | rs1476164   | rs1476164  | rs1476164   |
| rs55873183       | rs55873183  | rs55873183  | –          | rs55873183  |
| rs783562         | rs783562    | rs783562    | rs783562   | rs783562    |
| rs4879656        | rs4879656   | rs4879656   | rs4879656  | rs4879656   |
| rs10818873       | rs10818873  | rs10818873  | –          | rs10818873  |
| rs138114862      | –           | –           | –          | –           |
| rs10795520       | rs10795520  | rs10795520  | rs10795520 | rs10795520  |
| rs74701710       | rs74701710  | rs74701710  | –          | rs74701710  |
| rs10764106       | rs10764106  | rs10764106  | rs10764106 | rs10764106  |
| rs10997819       | rs10997819  | rs10997819  | rs10997819 | rs10997819  |
| rs10823203       | rs10823203  | rs10823203  | rs10823203 | rs10823203  |
| rs1889921        | rs1889921   | rs1889921   | rs1889921  | rs1889921   |
| rs7087644        | rs7087644   | rs7087644   | –          | rs7087644   |
| rs74430332       | rs74430332  | rs74430332  | –          | rs74430332  |
| rs10883451       | rs10883451  | rs10883451  | rs10883451 | rs10883451  |
| <b>rs7091889</b> | rs7091889   | rs7091889   | rs7091889  | rs7091889   |
| rs11245450       | rs11245450  | rs11245450  | rs11245450 | rs11245450  |
| rs728900         | rs728900    | –           | –          | –           |
| rs6578283        | rs6578283   | rs6578283   | rs6578283  | rs6578283   |
| rs7928823        | –           | –           | –          | –           |
| rs34591978       | –           | –           | –          | –           |
| rs11031006       | rs11031006  | rs11031006  | rs11031006 | rs11031006  |
| rs10734411       | rs10734411  | rs10734411  | rs10734411 | rs10734411  |
| rs10769315       | rs10769315  | rs10769315  | rs10769315 | rs10769315  |
| rs7943302        | rs7943302   | rs7943302   | rs7943302  | rs7943302   |
| rs10899493       | rs10899493  | rs10899493  | rs10899493 | rs10899493  |
| rs11400191       | –           | –           | –          | –           |
| rs60378595       | –           | –           | –          | –           |
| rs148681796      | rs148681796 | rs148681796 | –          | rs148681796 |
| rs10743271       | –           | –           | –          | –           |
| rs2376898        | rs2376898   | rs2376898   | rs2376898  | rs2376898   |
| rs77100210       | rs77100210  | rs77100210  | –          | rs77100210  |
| rs61913600       | rs61913600  | rs61913600  | rs61913600 | rs61913600  |
| rs10743724       | rs10743724  | rs10743724  | rs10743724 | rs10743724  |
| rs10219645       | –           | –           | –          | –           |
| rs2277339        | rs2277339   | rs2277339   | rs2277339  | rs2277339   |
| rs28473132       | –           | –           | –          | –           |
| rs7308068        | rs7308068   | rs7308068   | rs7308068  | rs7308068   |
| rs75770066       | rs75770066  | rs75770066  | –          | rs75770066  |
| rs61069255       | rs61069255  | rs61069255  | rs61069255 | rs61069255  |

It is made available under a [CC-BY 4.0 International license](https://creativecommons.org/licenses/by/4.0/).

|             |             |             |            |             |
|-------------|-------------|-------------|------------|-------------|
| rs192638119 | —           | —           | —          | —           |
| rs5800506   | —           | —           | —          | —           |
| rs6490269   | rs6490269   | rs6490269   | rs6490269  | rs6490269   |
| rs2942371   | rs2942371   | rs2942371   | rs2942371  | rs2942371   |
| rs73413716  | rs73413716  | rs73413716  | —          | rs73413716  |
| rs12825762  | rs12825762  | rs12825762  | rs12825762 | rs12825762  |
| rs35067339  | —           | —           | —          | —           |
| rs28416520  | rs28416520  | rs28416520  | rs28416520 | rs28416520  |
| rs7318091   | rs7318091   | rs7318091   | rs7318091  | rs7318091   |
| rs11571815  | rs11571815  | rs11571815  | —          | —           |
| rs112727324 | —           | —           | —          | —           |
| rs3736830   | rs3736830   | rs3736830   | rs3736830  | rs3736830   |
| rs7322160   | rs7322160   | rs7322160   | rs7322160  | rs7322160   |
| rs78566820  | rs78566820  | rs78566820  | —          | —           |
| rs12868295  | rs12868295  | rs12868295  | rs12868295 | rs12868295  |
| rs112097885 | —           | —           | —          | —           |
| rs1713426   | rs1713426   | rs1713426   | rs1713426  | rs1713426   |
| rs12879626  | rs12879626  | rs12879626  | rs12879626 | rs12879626  |
| rs61488898  | rs61488898  | rs61488898  | —          | rs61488898  |
| rs45547534  | rs45547534  | rs45547534  | —          | rs45547534  |
| rs1969713   | rs1969713   | rs1969713   | rs1969713  | rs1969713   |
| rs112326803 | rs112326803 | rs112326803 | —          | rs112326803 |
| rs762643    | rs762643    | rs762643    | rs762643   | rs762643    |
| rs1986616   | rs1986616   | rs1986616   | rs1986616  | rs1986616   |
| rs71126035  | —           | —           | —          | —           |
| rs375453823 | —           | —           | —          | —           |
| rs9796      | rs9796      | —           | —          | —           |
| rs689816    | rs689816    | rs689816    | rs689816   | rs689816    |
| rs11071756  | rs11071756  | rs11071756  | rs11071756 | rs11071756  |
| rs8025068   | rs8025068   | rs8025068   | rs8025068  | rs8025068   |
| rs8035724   | rs8035724   | rs8035724   | rs8035724  | rs8035724   |
| rs376442546 | —           | —           | —          | —           |
| rs716886    | rs716886    | rs716886    | rs716886   | rs716886    |
| rs62025270  | rs62025270  | rs62025270  | rs62025270 | rs62025270  |
| rs12898357  | rs12898357  | rs12898357  | rs12898357 | rs12898357  |
| rs28652789  | rs28652789  | rs28652789  | rs28652789 | rs28652789  |
| rs4786509   | rs4786509   | —           | —          | —           |
| rs17680522  | rs17680522  | rs17680522  | rs17680522 | rs17680522  |
| rs8045589   | rs8045589   | —           | —          | —           |
| rs9673473   | rs9673473   | —           | —          | —           |
| rs2173885   | —           | —           | —          | —           |
| rs11642909  | rs11642909  | rs11642909  | rs11642909 | rs11642909  |
| rs11075466  | rs11075466  | rs11075466  | rs11075466 | rs11075466  |
| rs10521305  | rs10521305  | rs10521305  | —          | rs10521305  |
| rs8045027   | rs8045027   | rs8045027   | rs8045027  | rs8045027   |
| rs200293726 | —           | —           | —          | —           |
| rs12447180  | rs12447180  | rs12447180  | rs12447180 | rs12447180  |
| rs502258    | rs502258    | rs502258    | rs502258   | rs502258    |
| rs62054610  | —           | —           | —          | —           |
| rs2108839   | —           | —           | —          | —           |
| rs5030755   | rs5030755   | rs5030755   | rs5030755  | rs5030755   |
| rs34856659  | rs34856659  | rs34856659  | rs34856659 | rs34856659  |
| rs222859    | —           | —           | —          | —           |
| rs569145577 | —           | —           | —          | —           |
| rs8073434   | rs8073434   | rs8073434   | rs8073434  | rs8073434   |
| rs1565920   | rs1565920   | rs1565920   | rs1565920  | rs1565920   |
| rs111637825 | rs111637825 | rs111637825 | —          | rs111637825 |
| rs799903    | —           | —           | —          | —           |
| rs1815198   | rs1815198   | rs1815198   | rs1815198  | rs1815198   |
| rs1991401   | rs1991401   | rs1991401   | rs1991401  | rs1991401   |
| rs34609096  | rs34609096  | rs34609096  | rs34609096 | rs34609096  |

|             |             |             |             |             |
|-------------|-------------|-------------|-------------|-------------|
| rs4800141   | rs4800141   | rs4800141   | rs4800141   | rs4800141   |
| rs142239484 | rs142239484 | rs142239484 | —           | —           |
| rs12605881  | rs12605881  | —           | —           | —           |
| rs11542373  | rs11542373  | rs11542373  | rs11542373  | rs11542373  |
| rs349306    | rs349306    | rs349306    | rs349306    | rs349306    |
| rs56225015  | rs56225015  | rs56225015  | rs56225015  | rs56225015  |
| rs12459191  | rs12459191  | rs12459191  | rs12459191  | rs12459191  |
| rs147068659 | —           | —           | —           | —           |
| rs148807049 | rs148807049 | rs148807049 | rs148807049 | rs148807049 |
| rs10406053  | rs10406053  | rs10406053  | rs10406053  | rs10406053  |
| rs191031532 | —           | —           | —           | —           |
| rs2359811   | rs2359811   | rs2359811   | rs2359811   | rs2359811   |
| rs11670032  | rs11670032  | rs11670032  | rs11670032  | rs11670032  |
| rs424223    | rs424223    | rs424223    | rs424223    | rs424223    |
| rs7249357   | rs7249357   | rs7249357   | rs7249357   | rs7249357   |
| rs11349039  | —           | —           | —           | —           |
| rs10409547  | —           | —           | —           | —           |
| rs11668344  | rs11668344  | rs11668344  | rs11668344  | rs11668344  |
| rs117146677 | rs117146677 | rs117146677 | —           | rs117146677 |
| rs8109672   | rs8109672   | rs8109672   | rs8109672   | rs8109672   |
| rs12461110  | rs12461110  | rs12461110  | rs12461110  | rs12461110  |
| rs8101859   | rs8101859   | rs8101859   | rs8101859   | rs8101859   |
| rs394448    | rs394448    | —           | —           | —           |
| rs6054257   | rs6054257   | rs6054257   | rs6054257   | rs6054257   |
| rs73078112  | rs73078112  | rs73078112  | —           | rs73078112  |
| rs236117    | rs236117    | rs236117    | rs236117    | rs236117    |
| rs16991615  | rs16991615  | rs16991615  | —           | rs16991615  |
| rs148563363 | rs148563363 | rs148563363 | —           | —           |
| rs746748    | rs746748    | rs746748    | —           | rs746748    |
| rs58065489  | rs58065489  | rs58065489  | rs58065489  | rs58065489  |
| rs11699793  | rs11699793  | rs11699793  | rs11699793  | rs11699793  |
| rs483508    | rs483508    | rs483508    | rs483508    | rs483508    |
| rs80047570  | —           | —           | —           | —           |
| rs7266248   | rs7266248   | rs7266248   | rs7266248   | rs7266248   |
| rs73307923  | rs73307923  | rs73307923  | —           | rs73307923  |
| rs6011452   | rs6011452   | rs6011452   | rs6011452   | rs6011452   |
| rs372721829 | rs372721829 | rs372721829 | —           | —           |
| rs10854167  | rs10854167  | rs10854167  | rs10854167  | rs10854167  |
| rs34978822  | rs34978822  | rs34978822  | —           | rs34978822  |
| rs139337637 | —           | —           | —           | —           |
| rs9975728   | rs9975728   | rs9975728   | rs9975728   | rs9975728   |
| rs4148974   | rs4148974   | rs4148974   | —           | rs4148974   |
| rs5746740   | rs5746740   | rs5746740   | rs5746740   | rs5746740   |
| rs5754100   | rs5754100   | rs5754100   | rs5754100   | rs5754100   |
| rs3838149   | —           | —           | —           | —           |
| rs62237617  | rs62237617  | rs62237617  | —           | —           |
| rs5762852   | rs5762852   | rs5762852   | rs5762852   | rs5762852   |
| rs140353819 | rs140353819 | rs140353819 | —           | —           |
| rs139906882 | rs139906882 | rs139906882 | —           | rs139906882 |
| rs138430    | rs138430    | rs138430    | rs138430    | rs138430    |
| rs2958663   | rs2958663   | —           | —           | —           |
| rs2272805   | rs2272805   | rs2272805   | rs2272805   | rs2272805   |
| rs148258173 | —           | —           | —           | —           |
| rs2382759   | —           | —           | —           | —           |
| rs62588628  | —           | —           | —           | —           |
| rs5953379   | —           | —           | —           | —           |
| rs5981360   | —           | —           | —           | —           |
| rs3213462   | —           | —           | —           | —           |

796 Abbreviations: GWAS, genome-wide association study; SNP, single nucleotide polymorphism. For  
797 more details on the SNPs see the GWAS by Ruth et al.

798 **eTable 2. Association between age at menopause and risk of stroke in EPIC-**

799 **CVD (n=7,883).**

| Outcome/Age at menopause (years) | No. of cases | Model 1          |                    | Model 2          |                    | Model 3          |                    |
|----------------------------------|--------------|------------------|--------------------|------------------|--------------------|------------------|--------------------|
|                                  |              | HR (95% CI)      | P <sub>trend</sub> | HR (95% CI)      | P <sub>trend</sub> | HR (95% CI)      | P <sub>trend</sub> |
| <b>Stroke</b>                    |              |                  |                    |                  |                    |                  |                    |
| <40                              | 240          | 1.44 (1.20-1.73) |                    | 1.34 (1.10-1.63) |                    | 1.37 (1.12-1.67) |                    |
| 40 to<45                         | 340          | 1.30 (1.11-1.53) |                    | 1.24 (1.05-1.46) |                    | 1.25 (1.06-1.47) |                    |
| 45 to <50                        | 828          | 1.16 (1.05-1.29) | <0.001             | 1.13 (1.02-1.26) | <0.001             | 1.14 (1.02-1.27) | <0.001             |
| 50 to <55                        | 1,095        | 1.00 (0.92-1.08) |                    | 1.00 (0.92-1.09) |                    | 1.00 (0.92-1.09) |                    |
| ≥55                              | 235          | 0.88 (0.73-1.05) |                    | 0.87 (0.72-1.05) |                    | 0.88 (0.73-1.07) |                    |
| per 5 years younger              | 2,738        | 1.13 (1.08-1.18) |                    | 1.10 (1.05-1.16) |                    | 1.11 (1.06-1.16) |                    |
| <b>Ischemic stroke</b>           |              |                  |                    |                  |                    |                  |                    |
| <40                              | 193          | 1.52 (1.24-1.85) |                    | 1.40 (1.13-1.73) |                    | 1.43 (1.15-1.77) |                    |
| 40 to<45                         | 270          | 1.34 (1.13-1.59) |                    | 1.27 (1.06-1.52) |                    | 1.28 (1.07-1.53) |                    |
| 45 to <50                        | 664          | 1.17 (1.04-1.30) | <0.001             | 1.14 (1.01-1.28) | <0.001             | 1.14 (1.02-1.28) | <0.001             |
| 50 to <55                        | 874          | 1.00 (0.92-1.09) |                    | 1.00 (0.91-1.10) |                    | 1.00 (0.91-1.10) |                    |
| ≥55                              | 185          | 0.85 (0.70-1.04) |                    | 0.84 (0.69-1.03) |                    | 0.85 (0.70-1.05) |                    |
| per 5 years younger              | 2,186        | 1.14 (1.09-1.20) |                    | 1.12 (1.06-1.17) |                    | 1.12 (1.06-1.18) |                    |
| <b>Hemorrhagic stroke</b>        |              |                  |                    |                  |                    |                  |                    |
| <40                              | 47           | 1.16 (0.84-1.60) |                    | 1.10 (0.80-1.53) |                    | 1.13 (0.81-1.57) |                    |
| 40 to<45                         | 70           | 1.15 (0.86-1.54) |                    | 1.13 (0.84-1.52) |                    | 1.13 (0.84-1.53) |                    |
| 45 to <50                        | 164          | 1.13 (0.95-1.35) | 0.232              | 1.11 (0.92-1.33) | 0.439              | 1.11 (0.93-1.33) | 0.384              |
| 50 to <55                        | 221          | 1.00 (0.86-1.16) |                    | 1.00 (0.85-1.17) |                    | 1.00 (0.85-1.17) |                    |
| ≥55                              | 50           | 0.98 (0.71-1.35) |                    | 1.02 (0.74-1.41) |                    | 1.02 (0.74-1.41) |                    |
| per 5 years younger              | 552          | 1.07 (0.99-1.16) |                    | 1.05 (0.97-1.14) |                    | 1.06 (0.97-1.15) |                    |
| <b>Intracerebral hemorrhage</b>  |              |                  |                    |                  |                    |                  |                    |
| <40                              | 30           | 1.31 (0.89-1.93) |                    | 1.32 (0.89-1.96) |                    | 1.34 (0.90-2.00) |                    |
| 40 to<45                         | 49           | 1.31 (0.92-1.88) |                    | 1.32 (0.92-1.90) |                    | 1.33 (0.93-1.91) |                    |
| 45 to <50                        | 91           | 1.01 (0.81-1.27) | 0.050              | 1.03 (0.81-1.30) | 0.054              | 1.03 (0.82-1.30) | 0.047              |
| 50 to <55                        | 147          | 1.00 (0.83-1.20) |                    | 1.00 (0.83-1.21) |                    | 1.00 (0.83-1.21) |                    |
| ≥55                              | 28           | 0.79 (0.52-1.20) |                    | 0.81 (0.53-1.22) |                    | 0.80 (0.53-1.22) |                    |
| per 5 years younger              | 345          | 1.15 (1.04-1.26) |                    | 1.14 (1.04-1.26) |                    | 1.15 (1.04-1.27) |                    |
| <b>Subarachnoid hemorrhage</b>   |              |                  |                    |                  |                    |                  |                    |
| <40                              | 17           | 0.93 (0.53-1.61) |                    | 0.79 (0.44-1.41) |                    | 0.81 (0.45-1.45) |                    |
| 40 to<45                         | 21           | 0.88 (0.54-1.44) |                    | 0.83 (0.51-1.35) |                    | 0.84 (0.51-1.36) |                    |
| 45 to <50                        | 73           | 1.32 (1.03-1.71) | 0.484              | 1.22 (0.94-1.58) | 0.182              | 1.22 (0.94-1.58) | 0.216              |
| 50 to <55                        | 74           | 1.00 (0.77-1.29) |                    | 1.00 (0.77-1.30) |                    | 1.00 (0.77-1.30) |                    |
| ≥55                              | 22           | 1.44 (0.89-2.32) |                    | 1.56 (0.95-2.55) |                    | 1.55 (0.95-2.55) |                    |
| per 5 years younger              | 207          | 0.94 (0.82-1.09) |                    | 0.89 (0.77-1.04) |                    | 0.90 (0.78-1.05) |                    |

800 Model 1 is adjusted for age; Model 2 is additionally adjusted for smoking status, body mass index,  
 801 HbA1c, total cholesterol, and hypertension; Model 3 is additionally adjusted for ever use of hormone  
 802 replacement therapy and age at menarche. Confidence intervals for each age at menopause category  
 803 are presented using quasi variances in order to enhance the comparison between individual categories.  
 804 Age at menopause from 50 to <55 years was used as reference category. P<sub>trend</sub> indicates P-value for  
 805 linear trend. Abbreviations: CI, confidence interval; HR, hazard ratio.



806 **eTable 3. Association between age at menopause and risk of stroke in the UK**

807 **Biobank (n=196,361).**

| Outcome/Age at menopause (years) | No. of cases | Model 1          |                    | Model 2          |                    | Model 3          |                    |
|----------------------------------|--------------|------------------|--------------------|------------------|--------------------|------------------|--------------------|
|                                  |              | HR (95% CI)      | P <sub>trend</sub> | HR (95% CI)      | P <sub>trend</sub> | HR (95% CI)      | P <sub>trend</sub> |
| <b>Stroke</b>                    |              |                  |                    |                  |                    |                  |                    |
| <40                              | 460          | 1.63 (1.48-1.78) |                    | 1.46 (1.33-1.61) |                    | 1.45 (1.32-1.59) |                    |
| 40 to <45                        | 551          | 1.31 (1.20-1.42) |                    | 1.23 (1.13-1.34) |                    | 1.23 (1.13-1.33) |                    |
| 45 to <50                        | 914          | 1.11 (1.04-1.19) | <0.001             | 1.08 (1.01-1.16) | <0.001             | 1.08 (1.01-1.15) | <0.001             |
| 50 to <55                        | 1,528        | 1.00 (0.95-1.05) |                    | 1.00 (0.95-1.05) |                    | 1.00 (0.95-1.06) |                    |
| ≥55                              | 579          | 1.02 (0.94-1.11) |                    | 1.01 (0.93-1.10) |                    | 1.01 (0.93-1.10) |                    |
| per 5 years younger              | 4,032        | 1.12 (1.09-1.15) |                    | 1.09 (1.07-1.12) |                    | 1.09 (1.06-1.12) |                    |
| <b>Ischemic stroke</b>           |              |                  |                    |                  |                    |                  |                    |
| <40                              | 341          | 1.65 (1.48-1.84) |                    | 1.45 (1.30-1.61) |                    | 1.43 (1.28-1.59) |                    |
| 40 to <45                        | 383          | 1.25 (1.13-1.38) |                    | 1.16 (1.05-1.29) |                    | 1.15 (1.04-1.28) |                    |
| 45 to <50                        | 686          | 1.15 (1.06-1.24) | <0.001             | 1.11 (1.02-1.20) | <0.001             | 1.10 (1.02-1.19) | <0.001             |
| 50 to <55                        | 1,121        | 1.00 (0.94-1.07) |                    | 1.00 (0.94-1.07) |                    | 1.00 (0.94-1.07) |                    |
| ≥55                              | 438          | 1.04 (0.94-1.15) |                    | 1.02 (0.93-1.13) |                    | 1.02 (0.93-1.12) |                    |
| per 5 years younger              | 2,969        | 1.12 (1.09-1.15) |                    | 1.09 (1.06-1.12) |                    | 1.08 (1.05-1.11) |                    |
| <b>Hemorrhagic stroke</b>        |              |                  |                    |                  |                    |                  |                    |
| <40                              | 119          | 1.56 (1.30-1.87) |                    | 1.52 (1.26-1.82) |                    | 1.53 (1.27-1.84) |                    |
| 40 to <45                        | 168          | 1.47 (1.26-1.71) |                    | 1.44 (1.24-1.68) |                    | 1.45 (1.24-1.69) |                    |
| 45 to <50                        | 228          | 1.03 (0.90-1.17) | <0.001             | 1.01 (0.88-1.15) | <0.001             | 1.01 (0.89-1.16) | <0.001             |
| 50 to <55                        | 407          | 1.00 (0.90-1.11) |                    | 1.00 (0.90-1.11) |                    | 1.00 (0.90-1.11) |                    |
| ≥55                              | 141          | 0.96 (0.81-1.14) |                    | 0.97 (0.82-1.16) |                    | 0.97 (0.82-1.16) |                    |
| per 5 years younger              | 1,063        | 1.13 (1.08-1.18) |                    | 1.12 (1.07-1.17) |                    | 1.12 (1.07-1.18) |                    |
| <b>Intracerebral hemorrhage</b>  |              |                  |                    |                  |                    |                  |                    |
| <40                              | 72           | 1.62 (1.28-2.04) |                    | 1.57 (1.25-1.99) |                    | 1.60 (1.27-2.02) |                    |
| 40 to <45                        | 96           | 1.41 (1.15-1.73) |                    | 1.39 (1.14-1.70) |                    | 1.41 (1.15-1.72) |                    |
| 45 to <50                        | 133          | 1.02 (0.85-1.22) | <0.001             | 1.01 (0.85-1.20) | <0.001             | 1.01 (0.85-1.21) | <0.001             |
| 50 to <55                        | 247          | 1.00 (0.88-1.14) |                    | 1.00 (0.87-1.14) |                    | 1.00 (0.87-1.15) |                    |
| ≥55                              | 83           | 0.86 (0.68-1.09) |                    | 0.87 (0.69-1.10) |                    | 0.87 (0.69-1.10) |                    |
| per 5 years younger              | 631          | 1.15 (1.08-1.22) |                    | 1.14 (1.07-1.21) |                    | 1.14 (1.07-1.21) |                    |
| <b>Subarachnoid hemorrhage</b>   |              |                  |                    |                  |                    |                  |                    |
| <40                              | 47           | 1.48 (1.10-1.98) |                    | 1.44 (1.07-1.93) |                    | 1.43 (1.06-1.92) |                    |
| 40 to <45                        | 72           | 1.55 (1.22-1.97) |                    | 1.52 (1.20-1.93) |                    | 1.52 (1.19-1.93) |                    |
| 45 to <50                        | 95           | 1.04 (0.85-1.27) | 0.009              | 1.01 (0.83-1.24) | 0.023              | 1.01 (0.83-1.24) | 0.028              |
| 50 to <55                        | 160          | 1.00 (0.85-1.17) |                    | 1.00 (0.85-1.17) |                    | 1.00 (0.85-1.18) |                    |
| ≥55                              | 58           | 1.12 (0.86-1.45) |                    | 1.15 (0.89-1.50) |                    | 1.15 (0.88-1.50) |                    |
| per 5 years younger              | 432          | 1.10 (1.02-1.19) |                    | 1.09 (1.01-1.18) |                    | 1.09 (1.00-1.17) |                    |

808 Model 1 is adjusted for age; Model 2 is additionally adjusted for smoking status, body mass index,  
 809 HbA1c, total cholesterol, and hypertension; Model 3 is additionally adjusted for ever use of hormone  
 810 replacement therapy and age at menarche. Confidence intervals for each age at menopause category  
 811 are presented using quasi variances in order to enhance the comparison between individual categories.  
 812 Age at menopause from 50 to <55 years was used as reference category. P<sub>trend</sub> indicates P-value for  
 813 linear trend. Abbreviations: CI, confidence interval; HR, hazard ratio.

814 **eTable 4. Mendelian Randomization analysis on genetically proxied age at**  
 815 **menopause and risk of stroke.**

| Method/Outcome                  | Overall          |         | EPIC-CVD         |         | UK Biobank       |         |
|---------------------------------|------------------|---------|------------------|---------|------------------|---------|
|                                 | HR (95% CI)      | P-value | HR (95% CI)      | P-value | HR (95% CI)      | P-value |
| <b>Stroke</b>                   |                  |         |                  |         |                  |         |
| IVW                             | 0.95 (0.82-1.09) | 0.445   | 1.01 (0.72-1.41) | 0.961   | 0.93 (0.80-1.09) | 0.386   |
| Simple median                   | 1.00 (0.79-1.25) | 0.982   | 1.00 (0.58-1.71) | 0.993   | 1.00 (0.77-1.29) | 0.983   |
| Weighted median                 | 0.98 (0.78-1.25) | 0.893   | 1.11 (0.63-1.94) | 0.717   | 0.96 (0.74-1.25) | 0.750   |
| MR-Egger                        | 0.91 (0.66-1.27) | 0.589   | 0.82 (0.38-1.77) | 0.611   | 0.94 (0.65-1.34) | 0.720   |
| Intercept                       | 1.00 (0.99-1.01) | 0.816   | 1.01 (0.99-1.03) | 0.556   | 1.00 (0.99-1.01) | 0.984   |
| <b>Ischemic stroke</b>          |                  |         |                  |         |                  |         |
| IVW                             | 0.98 (0.83-1.16) | 0.805   | 1.08 (0.75-1.57) | 0.672   | 0.96 (0.79-1.15) | 0.627   |
| Simple median                   | 0.99 (0.77-1.28) | 0.952   | 1.10 (0.62-1.97) | 0.738   | 0.97 (0.72-1.29) | 0.816   |
| Weighted median                 | 1.06 (0.81-1.39) | 0.681   | 1.25 (0.68-2.29) | 0.475   | 1.02 (0.75-1.38) | 0.920   |
| MR-Egger                        | 1.01 (0.69-1.48) | 0.960   | 0.87 (0.37-2.04) | 0.744   | 1.05 (0.68-1.61) | 0.827   |
| Intercept                       | 1.00 (0.99-1.01) | 0.862   | 1.01 (0.98-1.03) | 0.570   | 1.00 (0.99-1.01) | 0.633   |
| <b>Hemorrhagic stroke</b>       |                  |         |                  |         |                  |         |
| IVW                             | 0.85 (0.65-1.11) | 0.230   | 0.77 (0.44-1.37) | 0.377   | 0.87 (0.64-1.18) | 0.374   |
| Simple median                   | 0.98 (0.64-1.52) | 0.940   | 1.04 (0.42-2.58) | 0.935   | 0.97 (0.59-1.59) | 0.896   |
| Weighted median                 | 0.86 (0.55-1.34) | 0.508   | 0.81 (0.31-2.15) | 0.679   | 0.87 (0.53-1.44) | 0.594   |
| MR-Egger                        | 0.68 (0.37-1.26) | 0.219   | 0.70 (0.19-2.58) | 0.593   | 0.67 (0.33-1.36) | 0.268   |
| Intercept                       | 1.01 (0.99-1.02) | 0.432   | 1.00 (0.97-1.04) | 0.867   | 1.01 (0.99-1.03) | 0.422   |
| <b>Intracerebral hemorrhage</b> |                  |         |                  |         |                  |         |
| IVW                             | 0.92 (0.65-1.29) | 0.617   | 0.90 (0.44-1.83) | 0.770   | 0.92 (0.62-1.37) | 0.683   |
| Simple median                   | 1.00 (0.57-1.76) | 0.990   | 1.20 (0.37-3.89) | 0.756   | 0.95 (0.50-1.80) | 0.877   |
| Weighted median                 | 1.11 (0.62-2.00) | 0.715   | 1.28 (0.38-4.26) | 0.691   | 1.07 (0.55-2.08) | 0.843   |
| MR-Egger                        | 0.97 (0.44-2.15) | 0.935   | 0.74 (0.14-3.78) | 0.713   | 1.05 (0.42-2.62) | 0.911   |
| Intercept                       | 1.00 (0.98-1.02) | 0.880   | 1.01 (0.97-1.05) | 0.790   | 1.00 (0.97-1.02) | 0.748   |
| <b>Subarachnoid hemorrhage</b>  |                  |         |                  |         |                  |         |
| IVW                             | 0.75 (0.50-1.14) | 0.184   | 0.61 (0.26-1.43) | 0.252   | 0.81 (0.50-1.30) | 0.377   |
| Simple median                   | 0.80 (0.41-1.55) | 0.503   | 0.56 (0.15-2.08) | 0.383   | 0.90 (0.42-1.95) | 0.790   |
| Weighted median                 | 0.64 (0.33-1.24) | 0.187   | 0.56 (0.14-2.19) | 0.403   | 0.67 (0.31-1.43) | 0.296   |
| MR-Egger                        | 0.40 (0.15-1.06) | 0.066   | 0.62 (0.09-4.49) | 0.640   | 0.35 (0.12-1.06) | 0.064   |
| Intercept                       | 1.02 (0.99-1.04) | 0.161   | 1.00 (0.95-1.05) | 0.974   | 1.02 (1.00-1.05) | 0.104   |

816 Abbreviations: CI, confidence interval; IVW, inverse variance weighted; HR, hazard ratio. HRs are per  
 817 five years younger genetically proxied age at menopause.

818 **eTable 5. Stroke risk factors and female-specific factors stratified by fifths of the**  
 819 **polygenic risk score for age at menopause.**

| Characteristic                     | Polygenic risk score*      |                             |                             |                              |                              |
|------------------------------------|----------------------------|-----------------------------|-----------------------------|------------------------------|------------------------------|
|                                    | >0.393 to 1.12<br>n=39,128 | >0.275 to 0.393<br>n=39,127 | >0.172 to 0.275<br>n=39,127 | >0.0537 to 0.172<br>n=39,127 | -0.675 to 0.0537<br>n=39,127 |
| <b>Stroke risk factors</b>         |                            |                             |                             |                              |                              |
| Age, years                         | 58.8 ± 6.0                 | 59.4 ± 5.8                  | 59.3 ± 5.7                  | 59.6 ± 5.6                   | 59.8 ± 5.5                   |
| Hypertension                       | 19,466 (49.8%)             | 19,946 (51.0%)              | 20,012 (51.2%)              | 20,401 (52.2%)               | 20,771 (53.1%)               |
| Body mass index, kg/m <sup>2</sup> | 26.8 ± 5.1                 | 26.8 ± 5.0                  | 26.9 ± 5.0                  | 26.6 ± 5.1                   | 26.8 ± 5.1                   |
| Smoking status                     |                            |                             |                             |                              |                              |
| Never                              | 22,352 (57.4%)             | 22,544 (57.9%)              | 22,501 (57.8%)              | 22,596 (58.1%)               | 22,687 (58.3%)               |
| Ex                                 | 13,169 (33.8%)             | 12,935 (33.2%)              | 12,990 (33.4%)              | 12,868 (33.1%)               | 12,865 (33.1%)               |
| Current                            | 3,419 (8.8%)               | 3,451 (8.9%)                | 3,435 (8.8%)                | 3,457 (8.9%)                 | 3,371 (8.7%)                 |
| Total cholesterol, mmol/L          | 6.2 ± 1.1                  | 6.2 ± 1.1                   | 6.2 ± 1.1                   | 6.2 ± 1.1                    | 6.2 ± 1.1                    |
| HbA1c, %                           | 5.6 ± 0.6                  | 5.5 ± 0.5                   | 5.5 ± 0.5                   | 5.5 ± 0.6                    | 5.6 ± 0.6                    |
| <b>Female-specific factors</b>     |                            |                             |                             |                              |                              |
| Ever use of HRT                    | 20,485 (52.7%)             | 19,770 (50.8%)              | 19,355 (49.8%)              | 19,102 (49.1%)               | 18,527 (47.7%)               |
| Age at menarche, years             | 13.1 ± 1.6                 | 13.2 ± 1.6                  | 13.2 ± 1.6                  | 13.2 ± 1.6                   | 13.3 ± 1.6                   |

820 \*A higher polygenic risk score indicates a lower genetically proxied age at menopause. The  
 821 denominator for all percentages was the number of postmenopausal women without missing values in  
 822 the respective variable. Abbreviations: HbA1c, glycated hemoglobin; HRT, hormone replacement  
 823 therapy.

824 **eTable 6. Stroke risk factors and female-specific factors stratified by categories**

825 **of age at menopause.**

| Characteristic                     | Age at menopause, years |                       |                       |                       |                 |
|------------------------------------|-------------------------|-----------------------|-----------------------|-----------------------|-----------------|
|                                    | <40<br>n=17,461         | 40 to <45<br>n=23,508 | 45 to <50<br>n=45,778 | 50 to <55<br>n=77,933 | ≥55<br>n=24,415 |
| <b>Stroke risk factors</b>         |                         |                       |                       |                       |                 |
| Age, years                         | 55.4 ± 7.4              | 57.5 ± 6.9            | 58.4 ± 6.1            | 60.1 ± 4.9            | 62.3 ± 3.6      |
| Hypertension                       | 8,848 (50.9%)           | 11,862 (50.7%)        | 22,156 (48.6%)        | 39,291 (50.6%)        | 14,111 (57.9%)  |
| Body mass index, kg/m <sup>2</sup> | 27.5 ± 5.5              | 27.0 ± 5.2            | 26.8 ± 5.1            | 26.7 ± 4.9            | 27.2 ± 5.0      |
| Smoking status                     |                         |                       |                       |                       |                 |
| Never                              | 9,238 (53.1%)           | 12,848 (54.9%)        | 25,867 (56.7%)        | 46,662 (60.1%)        | 14,657 (60.3%)  |
| Ex                                 | 5,686 (32.7%)           | 7,943 (33.9%)         | 15,137 (33.2%)        | 25,549 (32.9%)        | 8,388 (34.5%)   |
| Current                            | 2,463 (14.2%)           | 2,612 (11.2%)         | 4,590 (10.1%)         | 5,489 (7.1%)          | 1,270 (5.2%)    |
| Total cholesterol, mmol/L          | 6.0 ± 1.2               | 6.2 ± 1.2             | 6.2 ± 1.1             | 6.2 ± 1.1             | 6.3 ± 1.1       |
| HbA1c, %                           | 5.5 ± 0.7               | 5.5 ± 0.6             | 5.6 ± 0.5             | 5.6 ± 0.5             | 5.6 ± 0.5       |
| <b>Female-specific factors</b>     |                         |                       |                       |                       |                 |
| Ever use of HRT                    | 11,733 (67.6%)          | 14,204 (60.8%)        | 22,551 (49.5%)        | 32,117 (41.4%)        | 11,898 (48.9%)  |
| Age at menarche, years             | 12.9 ± 1.8              | 13.0 ± 1.7            | 13.1 ± 1.6            | 13.2 ± 1.6            | 13.4 ± 1.6      |

826 The denominator for all percentages was the number of postmenopausal women without missing values  
827 in the respective variable. Abbreviations: HbA1c, glycated hemoglobin; HRT, hormone replacement  
828 therapy.

829 **Supplemental Figures**

830 **eFigure 1. Consistency of associations between age at menopause and risk of**  
 831 **various subtypes of stroke in EPIC-CVD and the UK Biobank.**

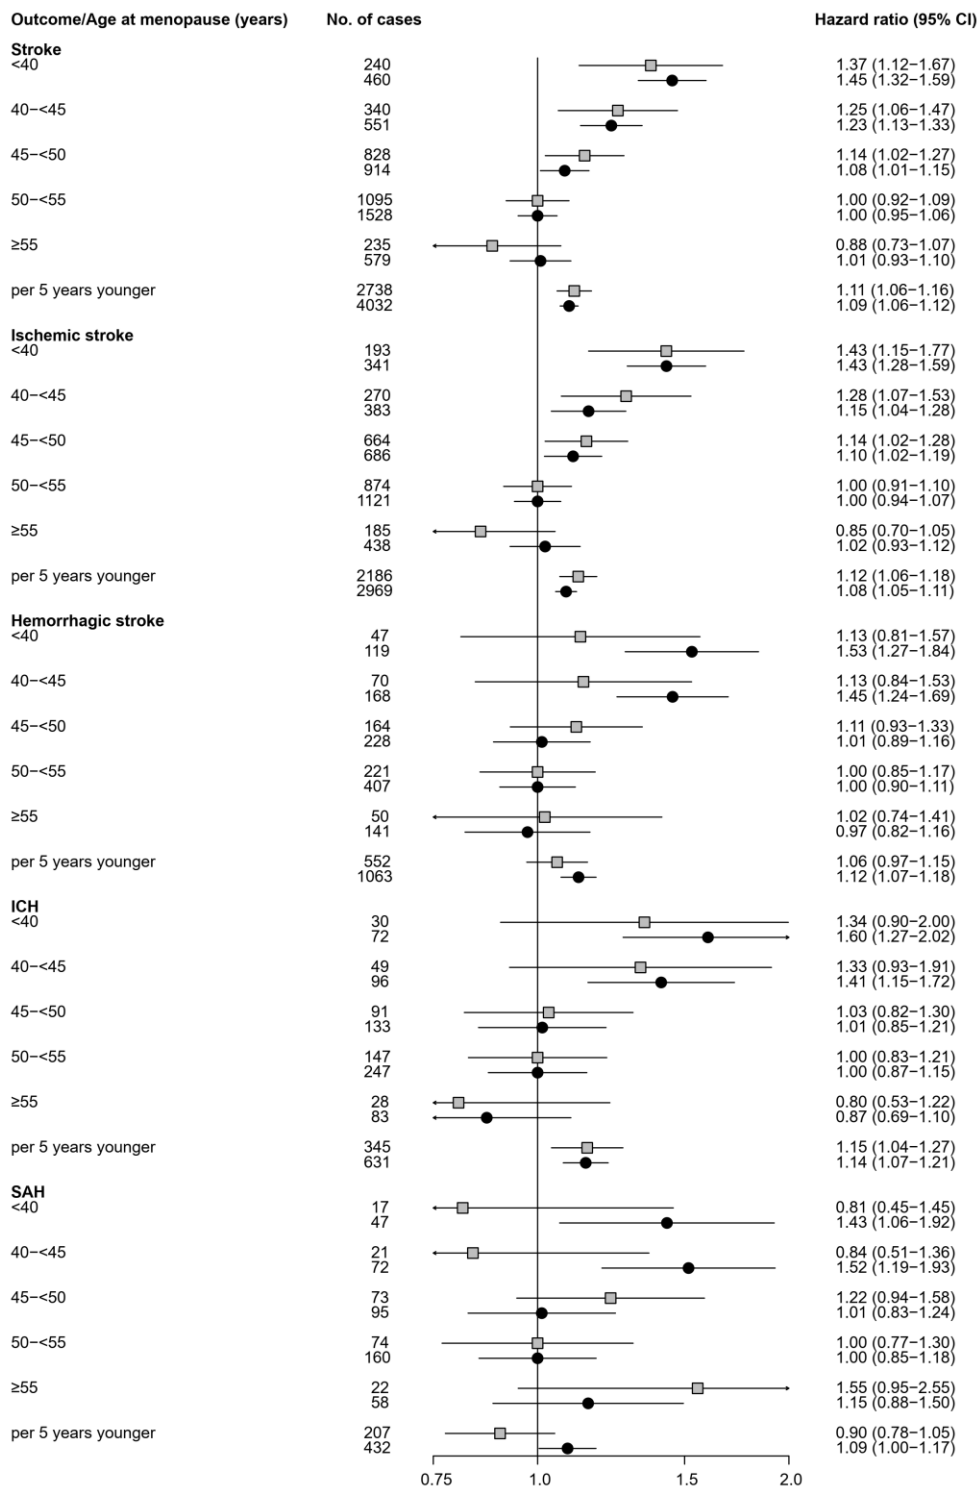

832 Gray squares indicate results from EPIC-CVD and black dots indicate results from the UKB. The models  
 833 were adjusted for age, smoking status, body mass index, glycated hemoglobin, total cholesterol,  
 834 hypertension, ever use of hormone replacement therapy, and age at menarche. Abbreviations: CI,  
 835 confidence interval; ICH, intracerebral hemorrhage; SAH, subarachnoid hemorrhage.  
 836

837 **eFigure 2. Observational analyses investigating the risk of different types of**  
 838 **stroke per five years younger age at menopause across several subgroups.**

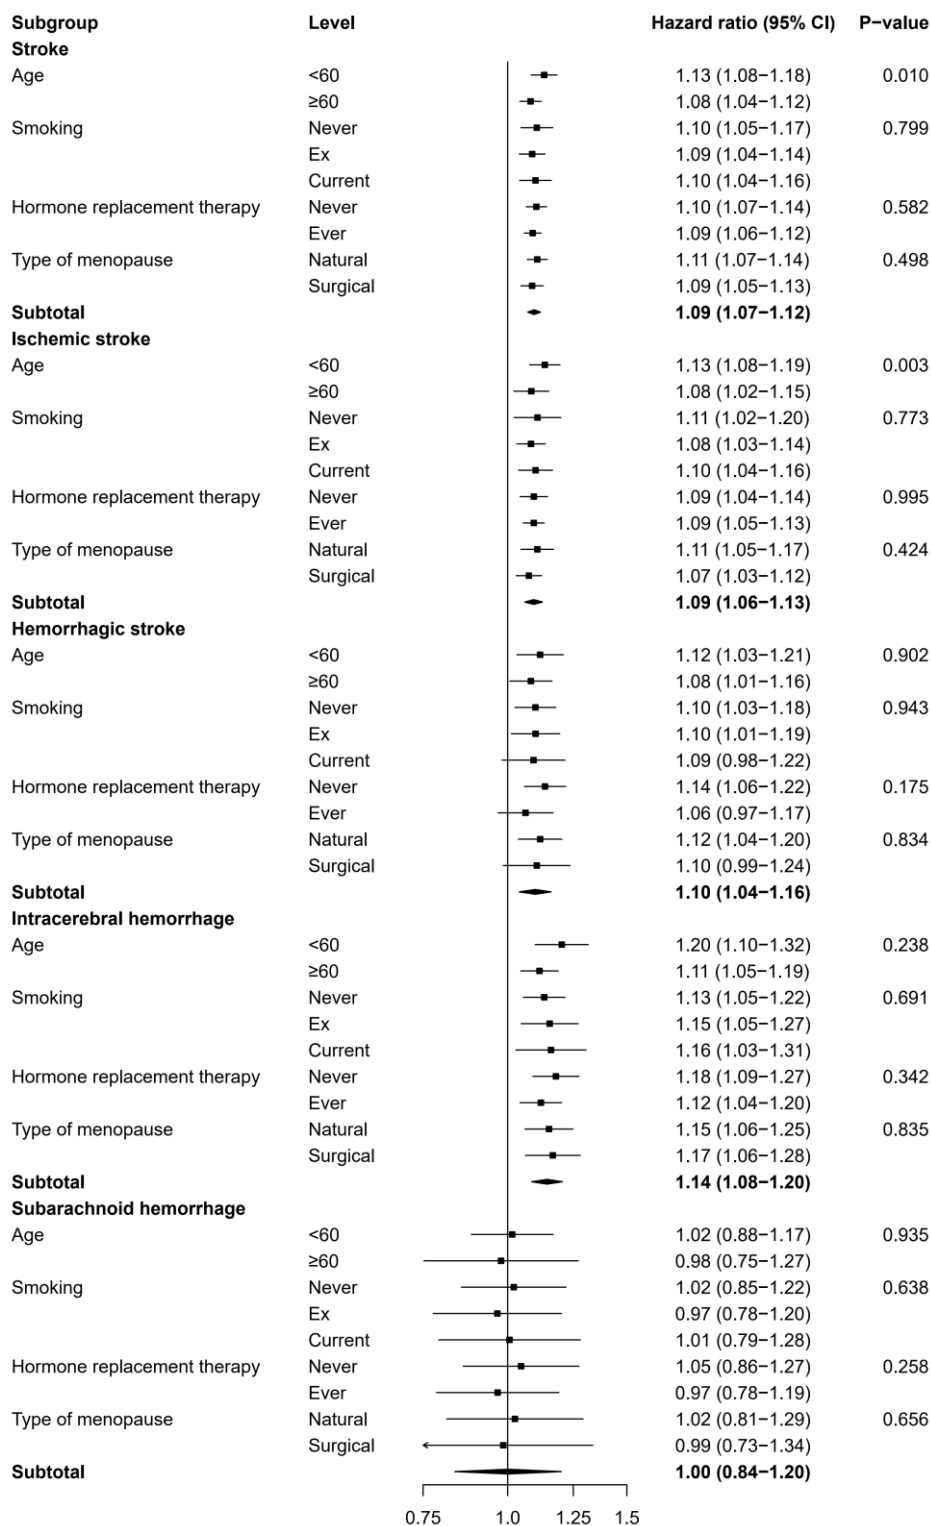

839 Abbreviations: CI, confidence interval. P-values indicate P-values for interaction for the categorical  
 840 variables smoking, hormone replacement therapy, and type of menopause. The P-value for interaction  
 841 for age has been obtained from a model in which age was included as a continuous variable. All  
 842 analyses were adjusted for the baseline variables age, smoking status, body mass index, glycated  
 843 hemoglobin, total cholesterol, hypertension, ever use of hormone replacement therapy, and age at  
 844 menarche, if appropriate.  
 845

846 **eFigure 3. Flow chart for selection process of SNPs.**

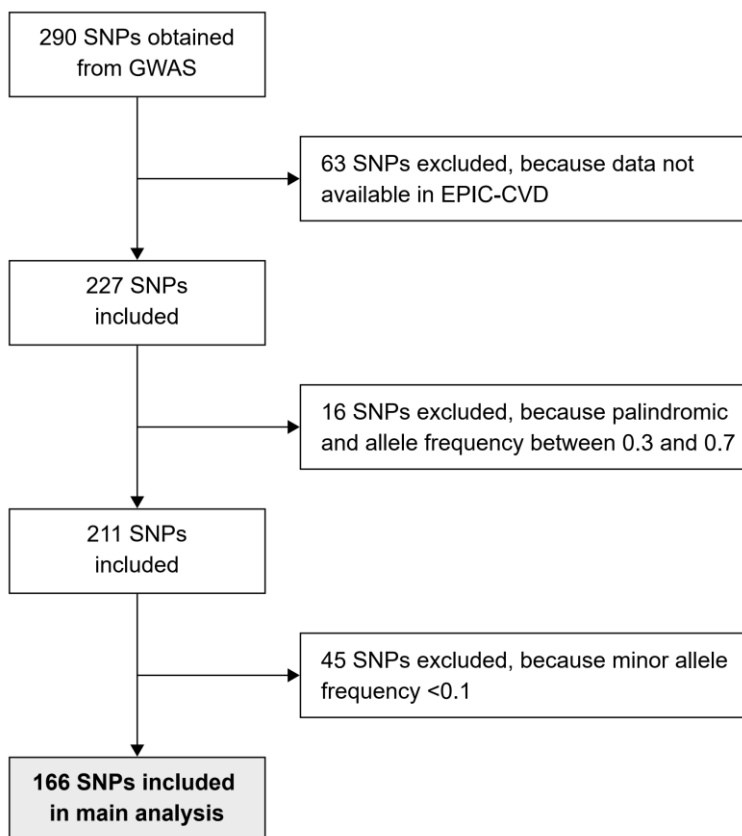

847  
848 Abbreviations: GWAS, genome-wide association study; SNP, single nucleotide polymorphism.

849 **eFigure 4. Mendelian Randomization analysis on genetically proxied age at**  
 850 **menopause and risk of stroke excluding very rare genetic variants only.**

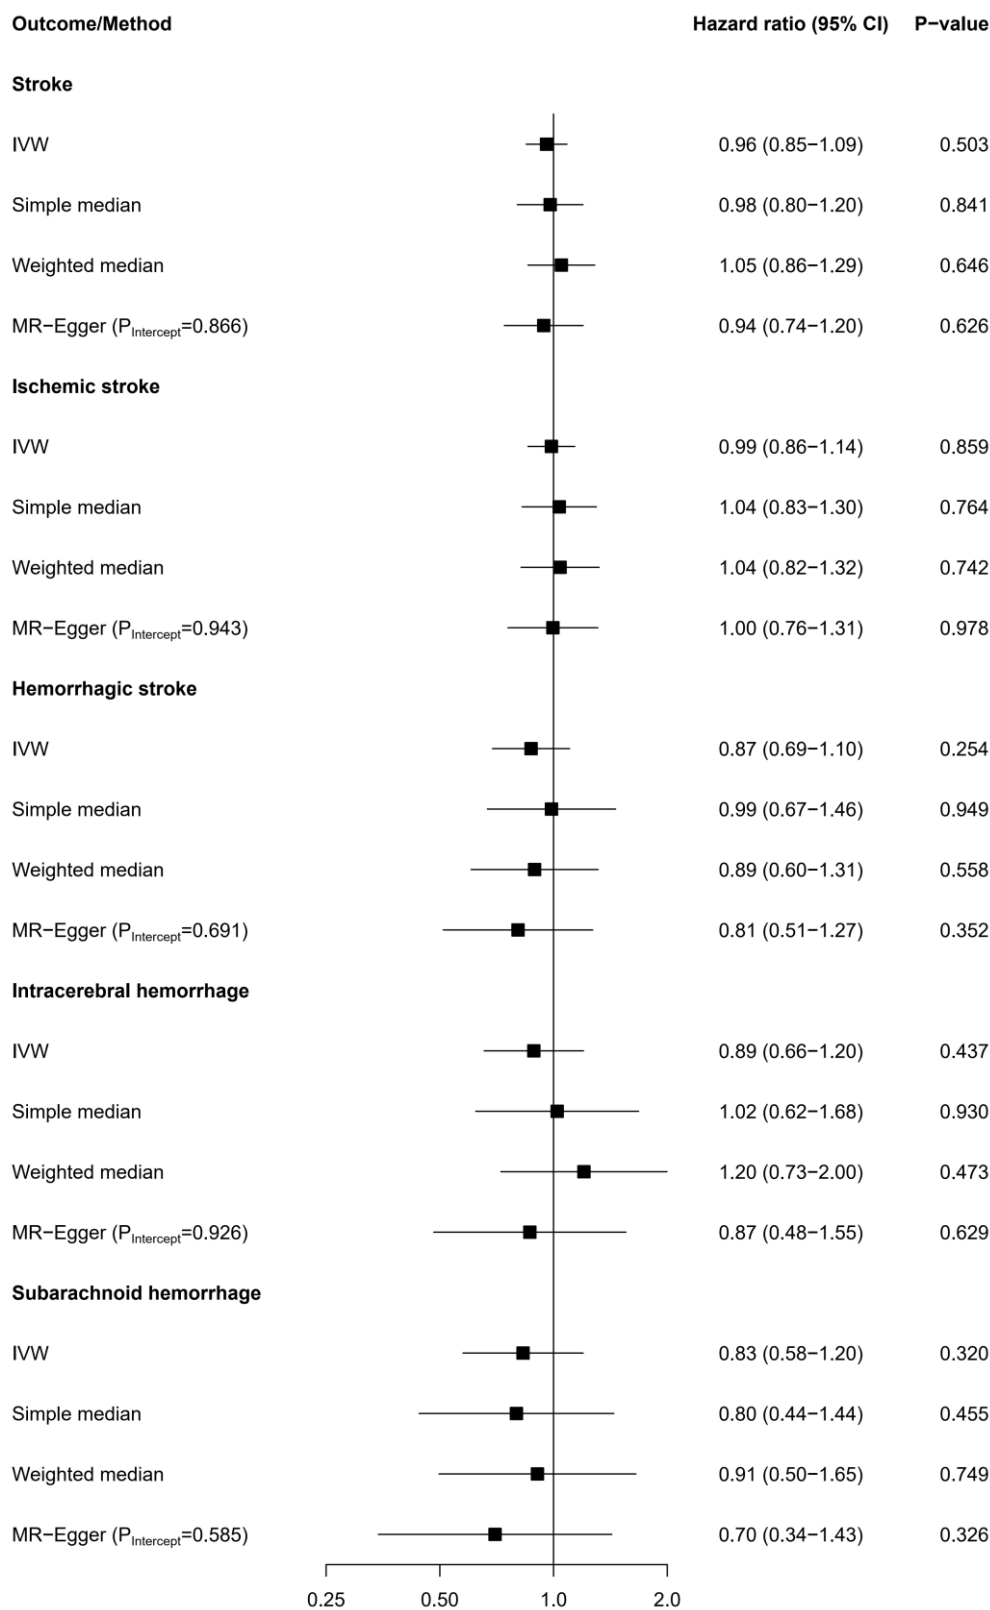

851  
 852 Abbreviations: CI, confidence interval; IVW, inverse variance weighted. Hazard ratios are per five years  
 853 younger genetically proxied age at menopause. SNPs with minor allele frequencies <0.01 were  
 854 excluded from this analysis and the analysis included 203 SNPs in total.



855 **eFigure 5. Mendelian Randomization analysis on genetically proxied age at**  
 856 **menopause and risk of stroke adjusted for phenotypes related to cardiovascular**  
 857 **risk.**

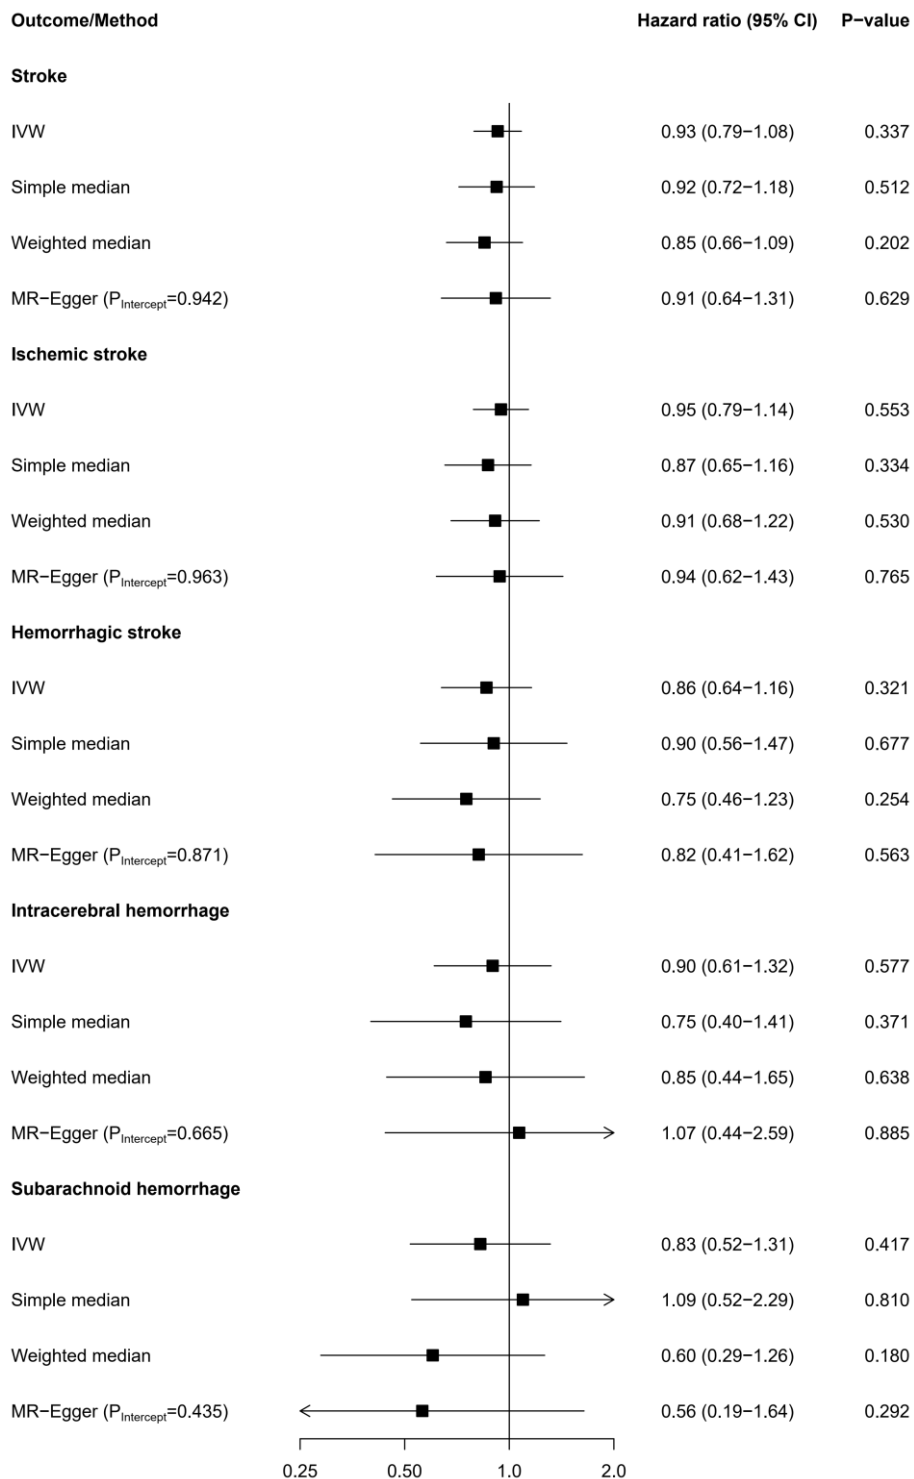

858 Abbreviations: CI, confidence interval; IVW, inverse variance weighted. Hazard ratios are per five years  
 859 younger genetically proxied age at menopause. The analysis was additionally adjusted for smoking  
 860 status, body mass index, glycated hemoglobin, total cholesterol, hypertension, ever use of hormone  
 861 replacement therapy, and age at menarche. This analysis included 169,809 participants with complete  
 862 data on all covariates (4,448 from EPIC-CVD and 165,361 from the UKB).  
 863
